# Supplementary material for: Revisiting demand rules for gene regulation
Source: Royal Society of Chemistry journal article supplement (doi:10.1039/c5mb00693g), 2015-11-23
Supplement: c5mb00693g1.xlsx [file c5mb00693g1.xlsx]

## Sheet: Sheet S1
This sheet contains interactions between all transcription factors (Regulators) and target gene E. coli. Plus (+) sign indicates the topology in which the corresponding interaction is present.
TF	Targets	Topology A	Topology B	Topology C	Topology D	Topology E	Topology F
AcrR	acrA						+
AcrR	acrB						+
AcrR	acrR						+
AcrR	micF						+
Ada	aidB		+	+
Ada	alkA		+	+
Ada	alkB		+	+		+	+
AdiY	adiA	+
AdiY	gadA	+
AdiY	gadB	+
AdiY	gadC	+
AdiY	gadX	+
AdiY	gltB	+
AdiY	gltD	+
AdiY	gltF	+
AgaR	agaA						+
AgaR	agaB						+
AgaR	agaC						+
AgaR	agaD						+
AgaR	agaI						+
AgaR	agaR						+
AgaR	agaS						+
AgaR	agaV						+
AgaR	agaW						+
AgaR	kbaY						+
AgaR	kbaZ						+
AidB	aidB						+
AlaS	alaS						+
AllR	allA				+
AllR	allB				+
AllR	allS				+
AllR	gcl				+
AllR	glxK				+
AllR	glxR				+
AllR	hyi				+
AllR	ybbW				+
AllR	ybbY				+
AllS	allC	+
AllS	allD	+
AllS	allE	+
AlsR	alsA						+
AlsR	alsB						+
AlsR	alsC						+
AlsR	alsE						+
AlsR	rpiB						+
AlsR	rpiR (alsR)						+
AppY	appA	+
AppY	appB	+
AppY	appC	+
AppY	hyaA	+
AppY	hyaB	+
AppY	hyaC	+
AppY	hyaD	+
AppY	hyaE	+
AppY	hyaF	+
AppY	yccB	+
AraC	araA		+	+		+	+
AraC	araB		+	+		+	+
AraC	araC		+	+		+	+
AraC	araD		+	+		+	+
AraC	araE		+	+
AraC	araF		+	+
AraC	araG		+	+
AraC	araH		+	+
AraC	araJ		+	+
AraC	xylA					+	+
AraC	xylB					+	+
ArcA	ackA	+
ArcA	appA	+
ArcA	appB	+
ArcA	appC	+
ArcA	appX	+
ArcA	caiA	+
ArcA	caiB	+
ArcA	caiC	+
ArcA	caiD	+
ArcA	caiE	+
ArcA	caiT	+
ArcA	cydA	+
ArcA	cydB	+
ArcA	cydC	+
ArcA	cydD	+
ArcA	dcuC	+
ArcA	dpiA	+
ArcA	dpiB	+
ArcA	focA	+
ArcA	fumB	+
ArcA	gadA	+
ArcA	gadE	+
ArcA	gadX	+
ArcA	grcA	+
ArcA	hemA	+
ArcA	hyaA	+
ArcA	hyaB	+
ArcA	hyaC	+
ArcA	hyaD	+
ArcA	hyaE	+
ArcA	hyaF	+
ArcA	iraM	+
ArcA	moeA	+
ArcA	moeB	+
ArcA	pflB	+
ArcA	prfA	+
ArcA	prmC	+
ArcA	rutA	+
ArcA	rutB	+
ArcA	rutC	+
ArcA	rutD	+
ArcA	rutE	+
ArcA	rutF	+
ArcA	rutG	+
ArcA	sdhA	+
ArcA	sdhB	+
ArcA	sdhC	+
ArcA	sdhD	+
ArcA	sucA	+
ArcA	sucB	+
ArcA	sucC	+
ArcA	sucD	+
ArcA	treB	+
ArcA	treC	+
ArcA	xylR	+
ArcA	ybdN	+
ArcA	aceA				+
ArcA	aceB				+
ArcA	aceE				+
ArcA	aceF				+
ArcA	aceK				+
ArcA	acnA				+
ArcA	acnB				+
ArcA	aldA				+
ArcA	arcZ				+
ArcA	betA				+
ArcA	betB				+
ArcA	betI				+
ArcA	betT				+
ArcA	cadA				+
ArcA	cadB				+
ArcA	citC				+
ArcA	citD				+
ArcA	citE				+
ArcA	citF				+
ArcA	citG				+
ArcA	citX				+
ArcA	cyoA				+
ArcA	cyoB				+
ArcA	cyoC				+
ArcA	cyoD				+
ArcA	cyoE				+
ArcA	dctA				+
ArcA	fadA				+
ArcA	fadB				+
ArcA	fadD				+
ArcA	fadE				+
ArcA	fadH				+
ArcA	fadI				+
ArcA	fadJ				+
ArcA	fadL				+
ArcA	fnr				+
ArcA	fumA				+
ArcA	fumC				+
ArcA	gatA				+
ArcA	gatB				+
ArcA	gatC				+
ArcA	gatD				+
ArcA	gatY				+
ArcA	gatZ				+
ArcA	glcA				+
ArcA	glcB				+
ArcA	glcD				+
ArcA	glcE				+
ArcA	glcF				+
ArcA	glcG				+
ArcA	glpA				+
ArcA	glpB				+
ArcA	glpC				+
ArcA	glpD				+
ArcA	gltA				+
ArcA	hybA				+
ArcA	hybB				+
ArcA	hybC				+
ArcA	hybD				+
ArcA	hybE				+
ArcA	hybF				+
ArcA	hybG				+
ArcA	hybO				+
ArcA	icd				+
ArcA	lldD				+
ArcA	lldP				+
ArcA	lldR				+
ArcA	lpd				+
ArcA	mdh				+
ArcA	ndh				+
ArcA	nuoA				+
ArcA	nuoB				+
ArcA	nuoC				+
ArcA	nuoE				+
ArcA	nuoF				+
ArcA	nuoG				+
ArcA	nuoH				+
ArcA	nuoI				+
ArcA	nuoJ				+
ArcA	nuoK				+
ArcA	nuoL				+
ArcA	nuoM				+
ArcA	nuoN				+
ArcA	oppA				+
ArcA	oppB				+
ArcA	oppC				+
ArcA	oppD				+
ArcA	oppF				+
ArcA	ptsG				+
ArcA	puuA				+
ArcA	puuB				+
ArcA	puuC				+
ArcA	puuD				+
ArcA	puuE				+
ArcA	puuP				+
ArcA	puuR				+
ArcA	rhaT				+
ArcA	rplB				+
ArcA	rplC				+
ArcA	rplD				+
ArcA	rplP				+
ArcA	rplV				+
ArcA	rplW				+
ArcA	rpmC				+
ArcA	rpoS				+
ArcA	rpsC				+
ArcA	rpsJ				+
ArcA	rpsQ				+
ArcA	rpsS				+
ArcA	sdhA				+
ArcA	sdhB				+
ArcA	sdhC				+
ArcA	sdhD				+
ArcA	sodA				+
ArcA	sroD				+
ArcA	ssb				+
ArcA	sucA				+
ArcA	sucB				+
ArcA	sucC				+
ArcA	sucD				+
ArcA	tpx				+
ArcA	ubiA				+
ArcA	ubiC				+
ArcA	uvrA				+
ArcA	ydeA				+
ArgP	argO			+
ArgP	argP						+
ArgP	dapB			+
ArgP	dapD			+
ArgP	dnaA			+
ArgP	dnaN			+
ArgP	gdhA			+
ArgP	lysA			+
ArgP	lysC			+
ArgP	lysP			+
ArgP	nrdA			+
ArgP	nrdB			+
ArgP	recF			+
ArgP	yfaE			+
ArgR	argA						+
ArgR	argB						+
ArgR	argC						+
ArgR	argD						+
ArgR	argE						+
ArgR	argF						+
ArgR	argG						+
ArgR	argH						+
ArgR	argR						+
ArgR	argI						+
ArgR	artI						+
ArgR	artJ						+
ArgR	artM						+
ArgR	artP						+
ArgR	artQ						+
ArgR	carA						+
ArgR	carB						+
ArgR	gltB						+
ArgR	gltD						+
ArgR	gltF						+
ArgR	hisJ						+
ArgR	hisM						+
ArgR	hisP						+
ArgR	hisQ						+
ArgR	infB						+
ArgR	metY						+
ArgR	nusA						+
ArgR	pnp						+
ArgR	rbfA						+
ArgR	rimP						+
ArgR	rpsO						+
ArgR	truB						+
ArgR	astA			+
ArgR	astB			+
ArgR	astC			+
ArgR	astD			+
ArgR	astE			+
ArsR	arsB						+
ArsR	arsC						+
ArsR	arsR						+
AscG	ascB				+
AscG	ascF				+
AscG	htpG				+
AscG	prpR				+
AscG	ybiT				+
AsnC	asnC						+
AsnC	mioC						+
AsnC	mnmG						+
AsnC	asnA			+
AtoC	atoA	+
AtoC	atoB	+
AtoC	atoD	+
AtoC	atoE	+
BaeR	acrD		+
BaeR	baeS		+
BaeR	mdtA		+
BaeR	baeS		+
BaeR	mdtB		+
BaeR	mdtC		+
BaeR	mdtD		+
BaeR	spy		+
BasR	csgD	+
BasR	csgE	+
BasR	csgF	+
BasR	csgG	+
BasR	cspI	+
BasR	dgkA	+
BasR	fimB	+
BasR	hha	+
BasR	qseB	+
BasR	qseC	+
BasR	tomB	+
BasR	putA				+
BasR	yrbL				+
BetI	betA						+
BetI	betB						+
BetI	betI						+
BetI	betT						+
BglJ	bglB	+
BglJ	bglF	+
BglJ	bglG	+
BglJ	leuO	+
BirA	bioA				+
BirA	bioB				+
BirA	bioC				+
BirA	bioD				+
BirA	bioF				+
BluR	ariR				+
BluR	ycgZ				+
BluR	ymgA				+
BluR	ymgC				+
BolA	ampC[ampC]	+			+
BolA	dacC[dacC]	+			+
CadC	cadA		+
CadC	cadB		+
CadC	cadC		+
CaiF	caiA	+
CaiF	caiB	+
CaiF	caiC	+
CaiF	caiD	+
CaiF	caiE	+
CaiF	caiT	+
CaiF	fixA	+
CaiF	fixB	+
CaiF	fixC	+
CaiF	fixX	+
Cbl	ssuA	+
Cbl	ssuB	+
Cbl	ssuC	+
Cbl	ssuD	+
Cbl	ssuE	+
Cbl	tauA	+
Cbl	tauB	+
Cbl	tauC	+
Cbl	tauD	+
CdaR	cdaR		+
CdaR	garD		+
CdaR	garK		+
CdaR	garL		+
CdaR	garP		+
CdaR	garR		+
CdaR	gudD		+
CdaR	gudP		+
CdaR	gudX		+
CdaR	rnpB		+
ChbR	chbA		+	+		+	+
ChbR	chbB		+	+		+	+
ChbR	chbC		+	+		+	+
ChbR	chbF		+	+		+	+
ChbR	chbG		+	+		+	+
ChbR	chbR
ComR	bhsA				+
CpxR	acrD		+
CpxR	aroG		+
CpxR	bacA		+
CpxR	baeR		+
CpxR	baeS		+
CpxR	cpxA		+
CpxR	cpxP		+
CpxR	cpxR		+
CpxR	degP		+
CpxR	dgcZ		+
CpxR	dsbA		+
CpxR	dsbC		+
CpxR	fabZ		+
CpxR	ftnB		+
CpxR	hha		+
CpxR	hlpA		+
CpxR	lpxA		+
CpxR	lpxD		+
CpxR	mdtA		+
CpxR	mdtB		+
CpxR	mdtC		+
CpxR	mdtD		+
CpxR	mzrA		+
CpxR	ompC		+
CpxR	ppiA		+
CpxR	ppiD		+
CpxR	rdoA		+
CpxR	rpoH		+
CpxR	sbmA		+
CpxR	slt		+
CpxR	spy		+
CpxR	tomB		+
CpxR	yaiW		+
CpxR	yccA		+
CpxR	ycfS		+
CpxR	yebE		+
CpxR	ygaU		+
CpxR	yidQ		+
CpxR	yqaE		+
CpxR	yqjA		+
CpxR	bamE					+
CpxR	cheA					+
CpxR	cheW					+
CpxR	csgA					+
CpxR	csgB					+
CpxR	csgC					+
CpxR	csgD					+
CpxR	csgE					+
CpxR	csgF					+
CpxR	csgG					+
CpxR	efeU_1					+
CpxR	efeU_2					+
CpxR	motA					+
CpxR	motB					+
CpxR	mscM					+
CpxR	ompF					+
CpxR	psd					+
CpxR	rpoE					+
CpxR	rseA					+
CpxR	rseB					+
CpxR	rseC					+
CpxR	tsr					+
CpxR	ung					+
Cra	aceA	+
Cra	aceB	+
Cra	aceK	+
Cra	acnA	+
Cra	aroP	+
Cra	betA	+
Cra	betB	+
Cra	betI	+
Cra	betT	+
Cra	crr	+
Cra	csgD	+
Cra	csgE	+
Cra	csgF	+
Cra	csgG	+
Cra	cydA	+
Cra	cydB	+
Cra	icd	+
Cra	pck	+
Cra	poxB	+
Cra	ppsA	+
Cra	ptsH	+
Cra	ptsI	+
Cra	aceE				+
Cra	aceF				+
Cra	acnB				+
Cra	adhE				+
Cra	crr				+
Cra	cyoA				+
Cra	cyoB				+
Cra	cyoC				+
Cra	cyoD				+
Cra	cyoE				+
Cra	cysG				+
Cra	eda				+
Cra	edd				+
Cra	eno				+
Cra	envC				+
Cra	epd				+
Cra	fbaA				+
Cra	fbaB				+
Cra	fruA				+
Cra	fruB				+
Cra	fruK				+
Cra	gapA				+
Cra	glcC				+
Cra	glk				+
Cra	gpmM				+
Cra	hypF				+
Cra	lpd				+
Cra	manX				+
Cra	manY				+
Cra	manZ				+
Cra	marA				+
Cra	marB				+
Cra	marR				+
Cra	mpl				+
Cra	mtlA				+
Cra	mtlD				+
Cra	mtlR				+
Cra	nirB				+
Cra	nirC				+
Cra	nirD				+
Cra	pdhR				+
Cra	pfkA				+
Cra	pgk				+
Cra	ppc				+
Cra	prpB				+
Cra	prpC				+
Cra	prpD				+
Cra	prpE				+
Cra	ptsH				+
Cra	ptsI				+
Cra	pykF				+
Cra	setA				+
Cra	sgrS				+
Cra	sgrT				+
Cra	tpiA				+
Cra	yahA				+
Cra	yeaD				+
Cra	yibQ				+
Cra	zwf				+
CreB	creD	+
CreB	talA	+
CreB	malE				+
CreB	malF				+
CreB	malG				+
CRP	aaeA		+	+
CRP	aaeB		+	+
CRP	aaeX		+	+
CRP	aceE		+	+
CRP	aceF		+	+
CRP	acnA		+	+
CRP	acnB		+	+
CRP	acs		+	+
CRP	actP		+	+
CRP	aer		+	+
CRP	agaA		+	+
CRP	agaV		+	+
CRP	agaW		+	+
CRP	agp		+	+
CRP	aldA		+	+
CRP	aldB		+	+
CRP	ansB		+	+
CRP	araA		+	+
CRP	araB		+	+
CRP	araC		+	+
CRP	araD		+	+
CRP	araE		+	+
CRP	araF		+	+
CRP	araG		+	+
CRP	araH		+	+
CRP	araJ		+	+		+	+
CRP	argG		+	+
CRP	ascB		+	+
CRP	ascF		+	+
CRP	aspA		+	+
CRP	bglB		+	+
CRP	bglF		+	+
CRP	bglG		+	+
CRP	caiA		+	+
CRP	caiB		+	+
CRP	caiC		+	+
CRP	caiD		+	+
CRP	caiE		+	+
CRP	caiF		+	+
CRP	caiT		+	+
CRP	cdd		+	+		+	+
CRP	chbA		+	+
CRP	chbB		+	+
CRP	chbC		+	+
CRP	chbF		+	+
CRP	chbG		+	+
CRP	chbR		+	+
CRP	cirA		+	+
CRP	cpdB		+	+
CRP	crp		+	+		+	+
CRP	csgD		+	+
CRP	csgE		+	+
CRP	csgF		+	+
CRP	csgG		+	+
CRP	csiD		+	+
CRP	csiE		+	+
CRP	cspE		+	+
CRP	cstA		+	+
CRP	cyaR		+	+
CRP	cyoA		+	+
CRP	cyoB		+	+
CRP	cyoC		+	+
CRP	cyoD		+	+
CRP	cyoE		+	+
CRP	cytR		+	+		+	+
CRP	dadA		+	+		+	+
CRP	dadX		+	+		+	+
CRP	dctA		+	+
CRP	dcuA		+	+
CRP	dcuB		+	+
CRP	dcuR		+	+
CRP	deoA		+	+		+	+
CRP	deoB		+	+		+	+
CRP	deoC		+	+		+	+
CRP	deoD		+	+		+	+
CRP	dksA		+	+
CRP	dsdA		+	+
CRP	dsdX		+	+
CRP	dusB		+	+		+	+
CRP	ebgA		+	+
CRP	ebgC		+	+
CRP	entA		+	+
CRP	entB		+	+
CRP	entC		+	+
CRP	entD		+	+
CRP	entE		+	+
CRP	entH		+	+
CRP	envZ		+	+		+	+
CRP	epd		+	+
CRP	exuT		+	+
CRP	fadD		+	+
CRP	fadH		+	+
CRP	fadL		+	+
CRP	fbaA		+	+
CRP	feaB		+	+
CRP	feaR		+	+
CRP	fecA		+	+
CRP	fecB		+	+
CRP	fecC		+	+
CRP	fecD		+	+
CRP	fecE		+	+
CRP	fepA		+	+
CRP	fis		+	+		+	+
CRP	fiu		+	+
CRP	fixA		+	+
CRP	fixB		+	+
CRP	fixC		+	+
CRP	fixX		+	+
CRP	flhC		+	+
CRP	flhD		+	+
CRP	focA		+	+
CRP	focB		+	+
CRP	fucA		+	+
CRP	fucI		+	+
CRP	fucK		+	+
CRP	fucO		+	+
CRP	fucP		+	+
CRP	fucR		+	+
CRP	fucU		+	+
CRP	fumA		+	+
CRP	fumB		+	+
CRP	fumC		+	+
CRP	fur		+	+
CRP	gabD		+	+
CRP	gabP		+	+
CRP	gabT		+	+
CRP	galE		+	+		+	+
CRP	galK		+	+		+	+
CRP	galM		+	+		+	+
CRP	galP		+	+
CRP	galS		+	+
CRP	galT		+	+
CRP	gapA		+	+
CRP	gatA		+	+
CRP	gatB		+	+
CRP	gatC		+	+
CRP	gatD		+	+
CRP	gatY		+	+
CRP	gatZ		+	+
CRP	gcvH		+	+
CRP	gcvP		+	+
CRP	gcvT		+	+
CRP	glcC		+	+
CRP	glgA		+	+
CRP	glgC		+	+
CRP	glgP		+	+
CRP	glgS		+	+
CRP	glnA		+	+
CRP	glnG		+	+		+	+
CRP	glnL		+	+		+	+
CRP	glpA		+	+
CRP	glpB		+	+
CRP	glpC		+	+
CRP	glpD		+	+
CRP	glpE		+	+
CRP	glpF		+	+
CRP	glpG		+	+
CRP	glpK		+	+
CRP	glpQ		+	+
CRP	glpR		+	+
CRP	glpT		+	+
CRP	glpX		+	+
CRP	gltA		+	+
CRP	gntK		+	+
CRP	gntP		+	+
CRP	gntT		+	+
CRP	gntU		+	+
CRP	gntX		+	+
CRP	grcA		+	+
CRP	grpE		+	+
CRP	guaA		+	+
CRP	guaB		+	+
CRP	gutM		+	+
CRP	gutQ		+	+
CRP	gyrA		+	+
CRP	hlyE		+	+
CRP	hofB		+	+
CRP	hofC		+	+
CRP	hofM		+	+
CRP	hofN		+	+
CRP	hofO		+	+
CRP	hofP		+	+
CRP	hpt		+	+
CRP	hupA		+	+
CRP	hupB		+	+
CRP	hyfA		+	+
CRP	hyfB		+	+
CRP	hyfC		+	+
CRP	hyfD		+	+
CRP	hyfE		+	+
CRP	hyfF		+	+
CRP	hyfG		+	+
CRP	hyfH		+	+
CRP	hyfI		+	+
CRP	hyfJ		+	+
CRP	hyfR		+	+
CRP	idnD		+	+
CRP	idnK		+	+
CRP	idnO		+	+
CRP	idnR		+	+
CRP	idnT		+	+
CRP	ilvB		+	+
CRP	ilvN		+	+
CRP	ivbL		+	+
CRP	kbaZ		+	+
CRP	lacA		+	+
CRP	lacI		+	+
CRP	lacY		+	+		+	+
CRP	lacZ		+	+		+	+
CRP	lamB		+	+
CRP	lhgO		+	+
CRP	lpd		+	+		+	+
CRP	lsrA		+	+
CRP	lsrB		+	+
CRP	lsrC		+	+
CRP	lsrD		+	+
CRP	lsrF		+	+
CRP	lsrG		+	+
CRP	lsrK		+	+
CRP	lsrR		+	+
CRP	lyxK		+	+
CRP	malE		+	+
CRP	malF		+	+
CRP	malG		+	+
CRP	malI		+	+		+	+
CRP	malK		+	+
CRP	malM		+	+
CRP	malS		+	+
CRP	malT		+	+
CRP	malX		+	+
CRP	malY		+	+
CRP	manA		+	+		+	+
CRP	manX		+	+
CRP	manY		+	+
CRP	manZ		+	+
CRP	marA		+	+
CRP	marB		+	+
CRP	marR		+	+
CRP	mazE		+	+
CRP	mazF		+	+
CRP	mcaS		+	+
CRP	mdh		+	+
CRP	melA		+	+
CRP	melB		+	+
CRP	melR		+	+
CRP	mglA		+	+
CRP	mglB		+	+
CRP	mglC		+	+
CRP	mhpA		+	+
CRP	mhpB		+	+
CRP	mhpC		+	+
CRP	mhpD		+	+
CRP	mhpE		+	+
CRP	mhpF		+	+
CRP	mhpR		+	+
CRP	mlc		+	+		+	+
CRP	modA		+	+
CRP	modB		+	+
CRP	modC		+	+
CRP	mpl		+	+
CRP	mtlA		+	+
CRP	mtlD		+	+
CRP	mtlR		+	+
CRP	murP		+	+
CRP	murQ		+	+
CRP	nadC		+	+
CRP	nagA		+	+		+	+
CRP	nagB		+	+		+	+
CRP	nagC		+	+		+	+
CRP	nagE		+	+		+	+
CRP	nanA		+	+
CRP	nanC		+	+
CRP	nanE		+	+
CRP	nanK		+	+
CRP	nanM		+	+
CRP	nanS		+	+
CRP	nanT		+	+
CRP	nfuA		+	+
CRP	nmpC		+	+
CRP	nrdA		+	+
CRP	nrdB		+	+
CRP	nupC		+	+
CRP	nupG		+	+		+	+
CRP	ompA		+	+
CRP	ompF		+	+
CRP	ompR		+	+		+	+
CRP	oxyR		+	+
CRP	paaA		+	+
CRP	paaB		+	+
CRP	paaC		+	+
CRP	paaD		+	+
CRP	paaE		+	+
CRP	paaF		+	+
CRP	paaG		+	+
CRP	paaH		+	+
CRP	paaI		+	+
CRP	paaJ		+	+
CRP	paaK		+	+
CRP	paaZ		+	+
CRP	pdhR		+	+
CRP	pflB		+	+
CRP	pgk		+	+
CRP	pka		+	+
CRP	ppdD		+	+
CRP	ppiA		+	+		+	+
CRP	preA		+	+
CRP	preT		+	+
CRP	priB		+	+
CRP	proP		+	+		+	+
CRP	prpB		+	+
CRP	prpC		+	+
CRP	prpD		+	+
CRP	prpE		+	+
CRP	prpR		+	+
CRP	ptsG		+	+
CRP	ptsH		+	+		+	+
CRP	ptsI		+	+
CRP	raiA		+	+
CRP	rbfA		+	+		+	+
CRP	rbsA		+	+
CRP	rbsB		+	+
CRP	rbsC		+	+
CRP	rbsD		+	+
CRP	rbsK		+	+
CRP	rbsR		+	+
CRP	relA		+	+
CRP	rhaA		+	+
CRP	rhaB		+	+
CRP	rhaD		+	+
CRP	rhaR		+	+
CRP	rhaS		+	+
CRP	rhaT		+	+
CRP	rmf		+	+
CRP	rplI		+	+
CRP	rpoH		+	+		+	+
CRP	rpsF		+	+
CRP	rpsR		+	+
CRP	sbmC		+	+
CRP	sdhA		+	+
CRP	sdhB		+	+
CRP	sdhC		+	+
CRP	sdhD		+	+
CRP	serA		+	+
CRP	sfsA		+	+
CRP	sgbE		+	+
CRP	sgbH		+	+
CRP	sgbU		+	+
CRP	sodA		+	+
CRP	srlA		+	+
CRP	srlB		+	+
CRP	srlD		+	+
CRP	srlE		+	+
CRP	srlR		+	+
CRP	sroD		+	+
CRP	sucA		+	+
CRP	sucB		+	+
CRP	sucC		+	+
CRP	sucD		+	+
CRP	tam		+	+
CRP	tdcA		+	+
CRP	tdcB		+	+
CRP	tdcC		+	+
CRP	tdcD		+	+
CRP	tdcE		+	+
CRP	tdcF		+	+
CRP	tdcG		+	+
CRP	tnaA		+	+
CRP	tnaB		+	+
CRP	tnaC		+	+
CRP	trg		+	+
CRP	tsx		+	+		+	+
CRP	ubiG		+	+
CRP	udp		+	+
CRP	udp		+	+		+	+
CRP	ugpA		+	+
CRP	ugpB		+	+
CRP	ugpC		+	+
CRP	ugpE		+	+
CRP	ugpQ		+	+
CRP	uhpT		+	+
CRP	uidA		+	+
CRP	uidB		+	+
CRP	uidC		+	+
CRP	ulaA		+	+
CRP	ulaB		+	+
CRP	ulaC		+	+
CRP	ulaD		+	+
CRP	ulaE		+	+
CRP	ulaF		+	+
CRP	umpH		+	+		+	+
CRP	uxaA		+	+
CRP	uxaB		+	+
CRP	uxaC		+	+
CRP	uxuA		+	+
CRP	uxuB		+	+
CRP	uxuR		+	+
CRP	xylA		+	+
CRP	xylB		+	+
CRP	xylF		+	+
CRP	xylG		+	+
CRP	xylH		+	+
CRP	xylR		+	+
CRP	ybiT		+	+
CRP	ycdZ		+	+		+	+
CRP	ychH		+	+
CRP	yeiP		+	+
CRP	yeiW		+	+
CRP	yfaE		+	+
CRP	yhcH		+	+
CRP	yhfA		+	+		+	+
CRP	yiaK		+	+
CRP	yiaL		+	+
CRP	yiaM		+	+
CRP	yiaN		+	+
CRP	yiaO		+	+
CRP	yjcH		+	+
CRP	yjiY		+	+
CRP	ykgR		+	+
CRP	ynfK		+	+
CRP	zraR		+	+
CRP	zraS		+	+
CRP	aaeR					+	+
CRP	aceA					+	+
CRP	aceB					+	+
CRP	aceK					+	+
CRP	ampD					+	+
CRP	ampE					+	+
CRP	arfB					+	+
CRP	aroA					+	+
CRP	azuC					+	+
CRP	bhsA					+	+
CRP	citC					+	+
CRP	citD					+	+
CRP	citE					+	+
CRP	citF					+	+
CRP	citG					+	+
CRP	citX					+	+
CRP	comR					+	+
CRP	crr					+	+
CRP	cyaA					+	+
CRP	cysG					+	+
CRP	dpiA					+	+
CRP	dpiB					+	+
CRP	gadA					+	+
CRP	gadB					+	+
CRP	gadC					+	+
CRP	gadE					+	+
CRP	gadX					+	+
CRP	galT					+	+
CRP	gcd					+	+
CRP	gdhA					+	+
CRP	glnA					+	+
CRP	gltB					+	+
CRP	gltD					+	+
CRP	gltF					+	+
CRP	hflC					+	+
CRP	hflK					+	+
CRP	hflX					+	+
CRP	hfq					+	+
CRP	infB					+	+
CRP	lacA					+	+
CRP	mdtE					+	+
CRP	mdtF					+	+
CRP	metK					+	+
CRP	metY					+	+
CRP	narQ					+	+
CRP	nirB					+	+
CRP	nirC					+	+
CRP	nirD					+	+
CRP	nlpE					+	+
CRP	nusA					+	+
CRP	osmY					+	+
CRP	pncB					+	+
CRP	pnp					+	+
CRP	psiE					+	+
CRP	putP					+	+
CRP	puuB					+	+
CRP	puuC					+	+
CRP	puuD					+	+
CRP	puuE					+	+
CRP	puuR					+	+
CRP	rimP					+	+
CRP	rof					+	+
CRP	rplM					+	+
CRP	rpsI					+	+
CRP	rpsO					+	+
CRP	serC					+	+
CRP	sodB					+	+
CRP	sohB					+	+
CRP	speC					+	+
CRP	spf					+	+
CRP	treB					+	+
CRP	treC					+	+
CRP	truB					+	+
CRP	trxA					+	+
CRP	xseA					+	+
CRP	yiaJ					+	+
CRP	yaeP					+	+
CRP	yaeQ					+	+
CRP	ybiS					+	+
CsgD	adrA		+
CsgD	csgA		+
CsgD	csgB		+
CsgD	csgC		+
CsgD	csgE		+
CsgD	csgF		+
CsgD	csgG		+
CsgD	iraP		+
CsgD	nlpA		+
CsgD	wrbA		+
CsgD	yccJ		+
CsgD	yccT		+
CsgD	fliE					+
CsgD	fliF					+
CsgD	fliG					+
CsgD	fliH					+
CsgD	fliI					+
CsgD	fliJ					+
CsgD	fliK					+
CsgD	pepD					+
CsgD	yhbS					+
CsgD	yhbT					+
CsiR	csiD				+
CsiR	gabD				+
CsiR	gabP				+
CsiR	gabT				+
CsiR	lhgO				+
CspA	gyrA	+
CspA	hns	+
CueR	copA	+
CueR	cueO	+
CueR	moaA				+
CueR	moaB				+
CueR	moaC				+
CueR	moaD				+
CueR	moaE				+
CusR	cusA		+
CusR	cusB		+
CusR	cusC		+
CusR	cusF		+
CusR	cusR		+
CusR	cusS		+
CynR	cynR						+
CynR	cynS			+
CynR	cynT			+
CynR	cynX			+
CysB	cysB						+
CysB	hslJ						+
CysB	ssuA						+
CysB	ssuB						+
CysB	ssuC						+
CysB	ssuD						+
CysB	ssuE						+
CysB	cbl			+
CysB	cysA			+
CysB	cysC			+
CysB	cysD			+
CysB	cysH			+
CysB	cysI			+
CysB	cysJ			+
CysB	cysK			+
CysB	cysM			+
CysB	cysN			+
CysB	cysP			+
CysB	cysU			+
CysB	cysW			+
CysB	tauA			+
CysB	tauB			+
CysB	tauC			+
CysB	tauD			+
CytR	cdd						+
CytR	cytR						+
CytR	deoA						+
CytR	deoB						+
CytR	deoC						+
CytR	deoD						+
CytR	nupC						+
CytR	nupG						+
CytR	ppiA						+
CytR	rpoH						+
CytR	tsx						+
CytR	udp						+
CytR	ycdZ						+
Dan	ttdA		+
Dan	ttdB		+
Dan	ttdR		+
Dan	ttdT		+
DcuR	dctA	+
DcuR	dcuB	+
DcuR	dpiA	+
DcuR	dpiB	+
DcuR	frdA	+
DcuR	frdB	+
DcuR	frdC	+
DcuR	frdD	+
DcuR	fumB	+
DeoR	deoA				+
DeoR	deoB				+
DeoR	deoC				+
DeoR	deoD				+
DeoR	nupG				+
DeoR	tsx				+
DhaR	dhaK			+
DhaR	dhaL			+
DhaR	dhaM			+
DhaR	dhaR						+
DicA	dicB				+
DicA	insD				+
DicA	intQ				+
DicA	ydfD				+
DicA	ydfE				+
DinJ	cspE						+
DinJ	dinJ						+
DinJ	yafQ						+
DnaA	aldA					+	+
DnaA	dnaA		+	+		+	+
DnaA	dnaN		+	+		+	+
DnaA	guaA					+	+
DnaA	guaB					+	+
DnaA	nrdA		+	+		+	+
DnaA	nrdB		+	+		+	+
DnaA	polA		+	+
DnaA	recF		+	+		+	+
DnaA	rpoH					+	+
DnaA	yfaE		+	+		+	+
DnaA	yjeV					+	+
DpiA	citC		+
DpiA	citD		+
DpiA	citE		+
DpiA	citF		+
DpiA	citG		+
DpiA	citX		+
DpiA	dpiA		+
DpiA	dpiB		+
DpiA	exuT		+
DpiA	mdh		+
DpiA	appY					+
DsdC	dsdA			+
DsdC	dsdC						+
DsdC	dsdX			+
EbgR	ebgA				+
EbgR	ebgC				+
EnvR	acrA				+
EnvR	acrB				+
EnvY	ompC	+
EnvY	ompF	+
EvgA	acrD		+
EvgA	emrK		+
EvgA	emrY		+
EvgA	evgA		+
EvgA	evgS		+
EvgA	frc		+
EvgA	gadE		+
EvgA	mdtE		+
EvgA	mdtF		+
EvgA	oxc		+
EvgA	safA		+
EvgA	ydeO		+
EvgA	ydeP		+
EvgA	yegR		+
EvgA	yegZ		+
EvgA	yfdE		+
EvgA	yfdV		+
EvgA	yfdX		+
ExuR	exuT						+
ExuR	uxaA						+
ExuR	uxaB						+
ExuR	uxaC						+
ExuR	uxuA						+
ExuR	uxuB						+
ExuR	uxuR						+
ExuR	exuR						+
FabR	fabA				+
FabR	fabB				+
FadR	fabA		+
FadR	fabB		+
FadR	fabD		+
FadR	fabG		+
FadR	fabH		+
FadR	fadR		+
FadR	iclR		+
FadR	fadA					+
FadR	fadB					+
FadR	fadD					+
FadR	fadE					+
FadR	fadH					+
FadR	fadI					+
FadR	fadJ					+
FadR	fadL					+
FadR	fadM					+
FadR	sroD					+
FadR	uspA					+
FeaR	feaB	+
FeaR	tynA	+
FhlA	fdhF		+
FhlA	focB		+
FhlA	hycA		+
FhlA	hycB		+
FhlA	hycC		+
FhlA	hycD		+
FhlA	hycE		+
FhlA	hycF		+
FhlA	hycG		+
FhlA	hycH		+
FhlA	hycI		+
FhlA	hydN		+
FhlA	hyfA		+
FhlA	hyfB		+
FhlA	hyfC		+
FhlA	hyfD		+
FhlA	hyfE		+
FhlA	hyfF		+
FhlA	hyfG		+
FhlA	hyfH		+
FhlA	hyfI		+
FhlA	hyfJ		+
FhlA	hyfR		+
FhlA	hypA		+
FhlA	hypB		+
FhlA	hypC		+
FhlA	hypD		+
FhlA	hypE		+
FhlA	hypF		+
FhlA	fhlA		+
Fis	acnB						+
Fis	acs						+
Fis	actP						+
Fis	aldB						+
Fis	ansB						+
Fis	bglB						+
Fis	bglF						+
Fis	bglG						+
Fis	crp						+
Fis	cspI						+
Fis	cysG						+
Fis	dmsA						+
Fis	dmsB						+
Fis	dmsC						+
Fis	dps						+
Fis	dusB						+
Fis	fumB						+
Fis	gadA						+
Fis	gadB						+
Fis	gadC						+
Fis	gadX						+
Fis	glcC						+
Fis	glnQ						+
Fis	gltX						+
Fis	guaA						+
Fis	guaB						+
Fis	gyrA						+
Fis	gyrB						+
Fis	hlyE						+
Fis	hupB						+
Fis	hyaA						+
Fis	hyaB						+
Fis	hyaC						+
Fis	hyaD						+
Fis	hyaE						+
Fis	hyaF						+
Fis	katE						+
Fis	mglA						+
Fis	mglC						+
Fis	msrA						+
Fis	mtlA						+
Fis	mtlD						+
Fis	mtlR						+
Fis	nanA						+
Fis	nanE						+
Fis	nanK						+
Fis	nanT						+
Fis	narG						+
Fis	narH						+
Fis	narI						+
Fis	narJ						+
Fis	narK						+
Fis	ndh						+
Fis	nirB						+
Fis	nirC						+
Fis	nirD						+
Fis	nrfA						+
Fis	nrfB						+
Fis	nrfC						+
Fis	nrfD						+
Fis	nrfE						+
Fis	nrfF						+
Fis	nrfG						+
Fis	ogt						+
Fis	osmE						+
Fis	osmY						+
Fis	pflB						+
Fis	ptsG						+
Fis	pyrD						+
Fis	rnpB						+
Fis	rplM						+
Fis	rpsI						+
Fis	topA						+
Fis	xylF						+
Fis	xylG						+
Fis	xylH						+
Fis	xylR						+
Fis	yeaR						+
Fis	yhcH						+
Fis	yjcH						+
Fis	yoaG						+
Fis	adhE			+
Fis	alaT			+
Fis	alaU			+
Fis	alaV			+
Fis	alaW			+
Fis	alaX			+
Fis	apaG			+
Fis	apaH			+
Fis	argU			+
Fis	argW			+
Fis	argX			+
Fis	aspV			+
Fis	carA			+
Fis	carB			+
Fis	deoA			+
Fis	deoB			+
Fis	deoC			+
Fis	deoD			+
Fis	fadA			+
Fis	fadB			+
Fis	flxA			+
Fis	glnA			+
Fis	glnG			+
Fis	glnL			+
Fis	glnU			+
Fis	glnV			+
Fis	glnW			+
Fis	glnX			+
Fis	glpA			+
Fis	glpB			+
Fis	glpC			+
Fis	glpQ			+
Fis	glpT			+
Fis	gltT			+
Fis	gltU			+
Fis	gltV			+
Fis	gltW			+
Fis	glyT			+
Fis	glyU			+
Fis	grcA			+
Fis	hisR			+
Fis	hns			+
Fis	hupA			+
Fis	ileT			+
Fis	ileU			+
Fis	ileV			+
Fis	infB			+
Fis	leuP			+
Fis	leuQ			+
Fis	leuT			+
Fis	leuV			+
Fis	leuW			+
Fis	leuX			+
Fis	lpd			+
Fis	lysT			+
Fis	lysV			+
Fis	lysW			+
Fis	malE			+
Fis	malF			+
Fis	malG			+
Fis	marA			+
Fis	marB			+
Fis	marR			+
Fis	mazE			+
Fis	mazF			+
Fis	mazG			+
Fis	metT			+
Fis	metU			+
Fis	metY			+
Fis	ndh			+
Fis	nrdA			+
Fis	nrdB			+
Fis	nuoA			+
Fis	nuoB			+
Fis	nuoC			+
Fis	nuoE			+
Fis	nuoF			+
Fis	nuoG			+
Fis	nuoH			+
Fis	nuoI			+
Fis	nuoJ			+
Fis	nuoK			+
Fis	nuoL			+
Fis	nuoM			+
Fis	nuoN			+
Fis	nusA			+
Fis	pdxA			+
Fis	pheU			+
Fis	pheV			+
Fis	pnp			+
Fis	proK			+
Fis	proL			+
Fis	proM			+
Fis	proP			+
Fis	ptsG			+
Fis	queA			+
Fis	rbfA			+
Fis	rimP			+
Fis	rnpB			+
Fis	rpsO			+
Fis	rrfA			+
Fis	rrfB			+
Fis	rrfC			+
Fis	rrfD			+
Fis	rrfE			+
Fis	rrfF			+
Fis	rrfG			+
Fis	rrfH			+
Fis	rrlA			+
Fis	rrlB			+
Fis	rrlC			+
Fis	rrlD			+
Fis	rrlE			+
Fis	rrlG			+
Fis	rrlH			+
Fis	rrsA			+
Fis	rrsB			+
Fis	rrsC			+
Fis	rrsD			+
Fis	rrsE			+
Fis	rrsG			+
Fis	rrsH			+
Fis	rsmA			+
Fis	serT			+
Fis	serX			+
Fis	sra			+
Fis	thrT			+
Fis	thrU			+
Fis	thrV			+
Fis	thrW			+
Fis	topA			+			+
Fis	tpr			+
Fis	trg			+
Fis	trmA			+
Fis	truB			+
Fis	tufB			+
Fis	tyrT			+
Fis	tyrU			+
Fis	tyrV			+
Fis	valT			+
Fis	valU			+
Fis	valX			+
Fis	valY			+
Fis	yfaE			+
Fis	fau			+			+
Fis	ssrS			+			+
Fis	fis						+
FlhDC	ccmA	+
FlhDC	ccmB	+
FlhDC	ccmC	+
FlhDC	ccmD	+
FlhDC	ccmE	+
FlhDC	ccmF	+
FlhDC	ccmG	+
FlhDC	ccmH	+
FlhDC	flgA	+
FlhDC	flgB	+
FlhDC	flgC	+
FlhDC	flgD	+
FlhDC	flgE	+
FlhDC	flgF	+
FlhDC	flgG	+
FlhDC	flgH	+
FlhDC	flgI	+
FlhDC	flgJ	+
FlhDC	flgM	+
FlhDC	flgN	+
FlhDC	flhA	+
FlhDC	flhB	+
FlhDC	flhE	+
FlhDC	fliA	+
FlhDC	fliD	+
FlhDC	fliE	+
FlhDC	fliF	+
FlhDC	fliG	+
FlhDC	fliH	+
FlhDC	fliI	+
FlhDC	fliJ	+
FlhDC	fliK	+
FlhDC	fliL	+
FlhDC	fliM	+
FlhDC	fliN	+
FlhDC	fliO	+
FlhDC	fliP	+
FlhDC	fliQ	+
FlhDC	fliR	+
FlhDC	fliS	+
FlhDC	fliT	+
FlhDC	fliY	+
FlhDC	fliZ	+
FlhDC	glpA	+
FlhDC	glpB	+
FlhDC	glpC	+
FlhDC	gltI	+
FlhDC	gltJ	+
FlhDC	gltK	+
FlhDC	gltL	+
FlhDC	hydN	+
FlhDC	hypF	+
FlhDC	napA	+
FlhDC	napB	+
FlhDC	napC	+
FlhDC	napD	+
FlhDC	napF	+
FlhDC	napG	+
FlhDC	napH	+
FlhDC	nrfA	+
FlhDC	nrfB	+
FlhDC	nrfC	+
FlhDC	nrfD	+
FlhDC	nrfE	+
FlhDC	nrfF	+
FlhDC	nrfG	+
FlhDC	ppdA	+
FlhDC	ppdB	+
FlhDC	ppdC	+
FlhDC	recC	+
FlhDC	sroC	+
FlhDC	ycgR	+
FlhDC	yecR	+
FlhDC	ygbK	+
FlhDC	ygdB	+
FlhDC	yhjH	+
FlhDC	mdh				+
FlhDC	mglA				+
FlhDC	mglB				+
FlhDC	mglC				+
FliZ	csgA				+
FliZ	csgB				+
FliZ	csgC				+
FliZ	csgD				+
FliZ	csgE				+
FliZ	csgF				+
FliZ	csgG				+
FliZ	flhC				+
FliZ	flhD				+
FliZ	gadB				+
FliZ	gadC				+
FliZ	gadE				+
FliZ	gmr				+
FliZ	hdeA				+
FliZ	hdeB				+
FliZ	mdtE				+
FliZ	mdtF				+
FliZ	mlrA				+
FliZ	osmY				+
FliZ	yhiD				+
FNR	aceE			+			+
FNR	aceF			+			+
FNR	acnA						+
FNR	aldA						+
FNR	amtB			+			+
FNR	arcA						+
FNR	aspA						+
FNR	aspC			+			+
FNR	citC						+
FNR	citD						+
FNR	citE						+
FNR	citF						+
FNR	citG						+
FNR	citX						+
FNR	cydA			+			+
FNR	cydB			+			+
FNR	cyoA						+
FNR	cyoB						+
FNR	cyoC						+
FNR	cyoD						+
FNR	cyoE						+
FNR	dpiA						+
FNR	dpiB						+
FNR	dppA						+
FNR	dppB						+
FNR	dppC						+
FNR	dppD						+
FNR	dppF						+
FNR	fdnG			+			+
FNR	fdnH			+			+
FNR	fdnI			+			+
FNR	focB						+
FNR	fumA						+
FNR	fumC						+
FNR	gadA						+
FNR	gadW						+
FNR	gadX						+
FNR	glnD			+			+
FNR	glnK			+			+
FNR	gltB						+
FNR	gltD						+
FNR	gltF						+
FNR	gnd						+
FNR	grcA			+			+
FNR	hemA						+
FNR	hmp						+
FNR	hyfA						+
FNR	hyfB						+
FNR	hyfC						+
FNR	hyfD						+
FNR	hyfE						+
FNR	hyfF						+
FNR	hyfG						+
FNR	hyfH						+
FNR	hyfI						+
FNR	hyfJ						+
FNR	hyfR						+
FNR	lpd			+			+
FNR	moeA						+
FNR	moeB						+
FNR	nac						+
FNR	narL						+
FNR	narX						+
FNR	ndh						+
FNR	norV						+
FNR	norW						+
FNR	nuoA						+
FNR	nuoB						+
FNR	nuoC						+
FNR	nuoE						+
FNR	nuoF						+
FNR	nuoG						+
FNR	nuoH						+
FNR	nuoI						+
FNR	nuoJ						+
FNR	nuoK						+
FNR	nuoL						+
FNR	nuoM						+
FNR	nuoN						+
FNR	ompX						+
FNR	pdhR			+			+
FNR	pheM						+
FNR	prfA						+
FNR	prmC						+
FNR	purM						+
FNR	purN						+
FNR	puuA						+
FNR	rimM						+
FNR	rplM						+
FNR	rplS						+
FNR	rplT						+
FNR	rpsI						+
FNR	rpsP						+
FNR	sdhA						+
FNR	sdhB						+
FNR	sdhC						+
FNR	sdhD						+
FNR	sodA						+
FNR	soxR						+
FNR	soxS						+
FNR	sucB						+
FNR	sucC						+
FNR	sucD						+
FNR	tpx						+
FNR	trmD						+
FNR	ubiA						+
FNR	ubiC						+
FNR	ychO						+
FNR	yeiL						+
FNR	ygbA						+
FNR	ysgA						+
FNR	ytfE						+
FNR	zwf						+
FNR	ackA			+
FNR	acrE			+
FNR	acrF			+
FNR	adhE			+
FNR	aer			+
FNR	ansB			+
FNR	arcA			+
FNR	aspA			+
FNR	bcsB			+
FNR	bcsZ			+
FNR	cadC			+
FNR	caiA			+
FNR	caiB			+
FNR	caiC			+
FNR	caiD			+
FNR	caiE			+
FNR	caiF			+
FNR	caiT			+
FNR	ccmA			+
FNR	ccmB			+
FNR	ccmC			+
FNR	ccmD			+
FNR	ccmE			+
FNR	ccmF			+
FNR	ccmG			+
FNR	ccmH			+
FNR	cheB			+
FNR	cheR			+
FNR	cheY			+
FNR	cheZ			+
FNR	cydA			+
FNR	cydB			+
FNR	cydC			+
FNR	cydD			+
FNR	cysG			+
FNR	dcuA			+
FNR	dcuB			+
FNR	dcuC			+
FNR	dcuR			+
FNR	dcuS			+
FNR	dmsA			+
FNR	dmsB			+
FNR	dmsC			+
FNR	dmsD			+
FNR	emrK			+
FNR	emrY			+
FNR	entF			+
FNR	fdhF			+
FNR	feoA			+
FNR	feoB			+
FNR	feoC			+
FNR	fepE			+
FNR	fes			+
FNR	fhlA			+
FNR	fixA			+
FNR	fixB			+
FNR	fixC			+
FNR	fixX			+
FNR	fnrS			+
FNR	focA			+
FNR	frdA			+
FNR	frdB			+
FNR	frdC			+
FNR	frdD			+
FNR	fumB			+
FNR	garK			+
FNR	garL			+
FNR	garP			+
FNR	garR			+
FNR	gcvH			+
FNR	gcvP			+
FNR	gcvT			+
FNR	gdhA			+
FNR	glpA			+
FNR	glpB			+
FNR	glpC			+
FNR	glpQ			+
FNR	glpT			+
FNR	hcp			+
FNR	hcr			+
FNR	hlyE			+
FNR	hypB			+
FNR	hypC			+
FNR	hypD			+
FNR	hypE			+
FNR	iraD			+
FNR	iraM			+
FNR	katG			+
FNR	malP			+
FNR	malQ			+
FNR	moaA			+
FNR	moaB			+
FNR	moaC			+
FNR	moaD			+
FNR	moaE			+
FNR	napA			+
FNR	napB			+
FNR	napC			+
FNR	napD			+
FNR	napF			+
FNR	napG			+
FNR	napH			+
FNR	narG			+
FNR	narH			+
FNR	narI			+
FNR	narJ			+
FNR	narK			+
FNR	nikA			+
FNR	nikB			+
FNR	nikC			+
FNR	nikD			+
FNR	nikE			+
FNR	nikR			+
FNR	nirB			+
FNR	nirC			+
FNR	nirD			+
FNR	nrdD			+
FNR	nrdG			+
FNR	nrfA			+
FNR	nrfB			+
FNR	nrfC			+
FNR	nrfD			+
FNR	nrfE			+
FNR	nrfF			+
FNR	nrfG			+
FNR	ompW			+
FNR	pepT			+
FNR	pflB			+
FNR	phoU			+
FNR	pitA			+
FNR	pstA			+
FNR	pstB			+
FNR	pstC			+
FNR	pstS			+
FNR	rnpB			+
FNR	rplB			+
FNR	rplC			+
FNR	rplD			+
FNR	rplP			+
FNR	rplV			+
FNR	rplW			+
FNR	rpmC			+
FNR	rpsC			+
FNR	rpsJ			+
FNR	rpsQ			+
FNR	rpsS			+
FNR	ssuA			+
FNR	ssuB			+
FNR	ssuC			+
FNR	ssuD			+
FNR	ssuE			+
FNR	tap			+
FNR	tar			+
FNR	tdcA			+
FNR	tdcB			+
FNR	tdcC			+
FNR	tdcD			+
FNR	tdcE			+
FNR	tdcF			+
FNR	tdcG			+
FNR	upp			+
FNR	uraA			+
FNR	uxaA			+
FNR	uxaC			+
FNR	xdhA			+
FNR	xdhB			+
FNR	xdhC			+
FNR	ybdN			+
FNR	ybdZ			+
FNR	ydeJ			+
FNR	ydhT			+
FNR	ydhU			+
FNR	ydhV			+
FNR	ydhW			+
FNR	ydhX			+
FNR	ydhY			+
FNR	yecR			+
FNR	yfgF			+
FNR	yhjA			+
FNR	ynfE			+
FNR	ynfF			+
FNR	ynfG			+
FNR	ynfH			+
FNR	yqjI			+
FucR	fucA		+
FucR	fucI		+
FucR	fucK		+
FucR	fucO		+
FucR	fucP		+
FucR	fucU		+
FucR	fucR		+
Fur	aspC						+
Fur	cirA						+
Fur	cyoA						+
Fur	cyoB						+
Fur	cyoC						+
Fur	cyoD						+
Fur	cyoE						+
Fur	entA						+
Fur	entB						+
Fur	entC						+
Fur	entD						+
Fur	entE						+
Fur	entF						+
Fur	entH						+
Fur	exbB						+
Fur	exbD						+
Fur	fecA						+
Fur	fecB						+
Fur	fecC						+
Fur	fecD						+
Fur	fecE						+
Fur	fecI						+
Fur	fecR						+
Fur	feoA						+
Fur	feoB						+
Fur	feoC						+
Fur	fepA						+
Fur	fepB						+
Fur	fepC						+
Fur	fepD						+
Fur	fepE						+
Fur	fepG						+
Fur	fes						+
Fur	fhuA						+
Fur	fhuB						+
Fur	fhuC						+
Fur	fhuD						+
Fur	fhuE						+
Fur	fhuF						+
Fur	fiu						+
Fur	flhC						+
Fur	flhD						+
Fur	fnr						+
Fur	fumC						+
Fur	fur						+
Fur	garK						+
Fur	garL						+
Fur	garP						+
Fur	garR						+
Fur	glnD						+
Fur	gltB						+
Fur	gltD						+
Fur	gltF						+
Fur	gnd						+
Fur	gpmA						+
Fur	grcA						+
Fur	gspC						+
Fur	gspD						+
Fur	gspE						+
Fur	gspF						+
Fur	gspG						+
Fur	gspH						+
Fur	gspI						+
Fur	gspJ						+
Fur	gspK						+
Fur	gspL						+
Fur	gspM						+
Fur	gspO						+
Fur	hmp						+
Fur	nac						+
Fur	ndh						+
Fur	nohA						+
Fur	nrdE						+
Fur	nrdF						+
Fur	nrdH						+
Fur	nrdI						+
Fur	metH						+
Fur	metJ						+
Fur	mntH						+
Fur	oppA						+
Fur	oppB						+
Fur	oppC						+
Fur	oppD						+
Fur	oppF						+
Fur	purR						+
Fur	pyrC						+
Fur	rcnA						+
Fur	rcnB						+
Fur	rnpB						+
Fur	rpoS						+
Fur	ryhB						+
Fur	sodA						+
Fur	soxR						+
Fur	soxS						+
Fur	sufA						+
Fur	sufB						+
Fur	sufC						+
Fur	sufD						+
Fur	sufE						+
[truncated: 2,062 more rows]
[truncated: 1 more columns]

## Sheet: Sheet S2
This sheet contains interactions of all transcription factors (Regulators) and their corresponding target promoters in E. coli. Plus (+) sign indicates the topology in which the corresponding interaction is present.
TF	Targets	Topology A	Topology B	Topology C	Topology D	Topology E	Topology F
AcrR	acrAB[acrA, acrB]						+
AcrR	acrR[acrR]						+
AcrR	micF[micF]						+
Ada	ada-alkB[ada, alkB]		+	+		+	+
Ada	aidB[aidB]		+	+
Ada	alkA[alkA]		+	+
Adiy	adiA[adiA]	+
Adiy	gadAXW[gadA, gadX]	+
Adiy	gadBC[gadB, gadC]	+
Adiy	gltBDF[gltB, gltD, gltF]	+
AgaR	agaR[agaR]						+
AgaR	agaS-kbaY-agaBCDI[agaB, agaC, agaD, agaI, agaS, kbaY]						+
AgaR	kbaZ-agaVWA[agaA, agaV, agaW, kbaZ]						+
AidB	aidB[aidB]						+
AlaS	alaS[alaS]						+
AllR	allA[allA]				+
AllR	allS[allS]				+
AllR	gcl-hyi-glxR-ybbW-allB-ybbY-glxK[allB, gcl, glxK, glxR, hyi, ybbW, ybbY]				+
AllS	allDCE[allC, allD, allE]	+
AlsR	rpiB[rpiB]						+
AlsR	rpiR-alsBACE[alsA, alsB, alsC, alsE, rpiR]						+
AppY	appCBXA[appA, appB, appC, appX]	+
AppY	hyaABCDEF[hyaA, hyaB, hyaC, hyaD, hyaE, hyaF]	+
AraC	araBAD[araA, araB, araD]		+	+		+	+
AraC	araC[araC]		+	+		+	+
AraC	araE[araE]		+	+
AraC	araFGH[araF, araG, araH]		+	+
AraC	araJ[araJ]		+	+
AraC	xylAB[xylA, xylB]					+	+
ArcA	ackA-pta[ackA]	+
ArcA	appCBXA[appA, appB, appC, appX]	+
ArcA	caiTABCDE[caiA, caiB, caiC, caiD, caiE, caiT]	+
ArcA	cydAB[cydA, cydB]	+
ArcA	cydDC[cydC, cydD]	+
ArcA	dcuB-fumB[fumB]	+
ArcA	dcuC[dcuC]	+
ArcA	dpiBA[dpiA, dpiB]	+
ArcA	focA-pflB[focA, pflB]	+
ArcA	gadAXW[gadA, gadX]	+
ArcA	gadE-mdtEF[gadE]	+
ArcA	grcA[grcA]	+
ArcA	hemA-prfA-prmC[hemA, prfA, prmC]	+
ArcA	hyaABCDEF[hyaA, hyaB, hyaC, hyaD, hyaE, hyaF]	+
ArcA	iraM[iraM]	+
ArcA	moeAB[moeA, moeB]	+
ArcA	rutABCDEFG[rutA, rutB, rutC, rutD, rutE, rutF, rutG]	+
ArcA	sdhCDAB-sucABCD[sdhA, sdhB, sdhC, sdhD, sucA, sucB, sucC, sucD]	+
ArcA	treBC[treB, treC]	+
ArcA	xylFGHR[xylR]	+
ArcA	ybdN[ybdN]	+
ArcA	aceBAK[aceA, aceB, aceK]				+
ArcA	acnA[acnA]				+
ArcA	acnB[acnB]				+
ArcA	aldA[aldA]				+
ArcA	arcZ[arcZ]				+
ArcA	betIBA[betA, betB, betI]				+
ArcA	betT[betT]				+
ArcA	cadBA[cadA, cadB]				+
ArcA	citCDEFXG[citC, citD, citE, citF, citG, citX]				+
ArcA	cyoABCDE[cyoA, cyoB, cyoC, cyoD, cyoE]				+
ArcA	dctA[dctA]				+
ArcA	fadBA[fadA, fadB]				+
ArcA	fadD-sroD[fadD, sroD]				+
ArcA	fadE[fadE]				+
ArcA	fadH[fadH]				+
ArcA	fadIJ[fadI, fadJ]				+
ArcA	fadL[fadL]				+
ArcA	fnr[fnr]				+
ArcA	fumAC[fumA, fumC]				+
ArcA	gatYZABCD[gatA, gatB, gatC, gatD, gatY, gatZ]				+
ArcA	glcDEFGBA[glcA, glcB, glcD, glcE, glcF, glcG]				+
ArcA	glpABC[glpA, glpB, glpC]				+
ArcA	glpD[glpD]				+
ArcA	gltA[gltA]				+
ArcA	hybOABCDEFG[hybA, hybB, hybC, hybD, hybE, hybF, hybG, hybO]				+
ArcA	icd[icd]				+
ArcA	lldPRD[lldD, lldP, lldR]				+
ArcA	mdh[mdh]				+
ArcA	ndh[ndh]				+
ArcA	nlpD-rpoS[rpoS]				+
ArcA	nuoABCEFGHIJKLMN[nuoA, nuoB, nuoC, nuoE, nuoF, nuoG, nuoH, nuoI, nuoJ, nuoK, nuoL, nuoM, nuoN]				+
ArcA	oppABCDF[oppA, oppB, oppC, oppD, oppF]				+
ArcA	pdhR-aceEF-lpd[aceE, aceF, lpd]				+
ArcA	ptsG[ptsG]				+
ArcA	puuAP[puuA, puuP]				+
ArcA	puuDRCBE[puuB, puuC, puuD, puuE, puuR]				+
ArcA	rhaT[rhaT]				+
ArcA	rpsJ-rplCDWB-rpsS-rplV-rpsC-rplP-rpmC-rpsQ[rplB, rplC, rplD, rplP, rplV, rplW, rpmC, rpsC, rpsJ, rpsQ, rpsS]				+
ArcA	sdhCDAB-sucABCD[sdhA, sdhB, sdhC, sdhD, sucA, sucB, sucC, sucD]				+
ArcA	sodA[sodA]				+
ArcA	ssb[ssb]				+
ArcA	tpx[tpx]				+
ArcA	ubiCA[ubiA, ubiC]				+
ArcA	uvrA[uvrA]				+
ArcA	ydeA[ydeA]				+
ArgP	argO[argO]			+
ArgP	argP[argP]						+
ArgP	dapB[dapB]			+
ArgP	dnaAN-recF[dnaA, dnaN, recF]			+
ArgP	gdhA[gdhA]			+
ArgP	lysA[lysA]			+
ArgP	lysC[lysC]			+
ArgP	lysP[lysP]			+
ArgP	map-glnD-dapD[dapD]			+
ArgP	nrdAB-yfaE[nrdA, nrdB, yfaE]			+
ArgR	argA[argA]						+
ArgR	argCBH[argB, argC, argH]						+
ArgR	argD[argD]						+
ArgR	argE[argE]						+
ArgR	argF[argF]						+
ArgR	argG[argG]						+
ArgR	argI[argI]						+
ArgR	argR[argR]						+
ArgR	argT-hisJQMP[hisJ, hisM, hisP, hisQ]						+
ArgR	artJ[artJ]						+
ArgR	artPIQM[artI, artM, artP, artQ]						+
ArgR	carAB[carA, carB]						+
ArgR	gltBDF[gltB, gltD, gltF]						+
ArgR	metY-rimP-nusA-infB-rbfA-truB-rpsO-pnp[infB, metY, nusA, pnp, rbfA, rimP, rpsO, truB]						+
ArgR	astCADBE[astA, astB, astC, astD, astE]			+
ArsR	arsRBC[arsB, arsC, arsR]						+
AscG	ascFB[ascB, ascF]				+
AscG	htpG[htpG]				+
AscG	prpR[prpR]				+
AscG	ybiT[ybiT]				+
AsnC	asnC-mioC-mnmG-rsmG[asnC, mioC, mnmG]						+
AsnC	asnA[asnA]			+
AtoC	atoDAEB[atoA, atoB, atoD, atoE]	+
BaeR	acrD[acrD]		+
BaeR	mdtABCD-baeSR[baeR, baeS, mdtA, mdtB, mdtC, mdtD]		+
BaeR	spy[spy]		+
BasR	csgDEFG[csgD, csgE, csgF, csgG]	+
BasR	cspI[cspI]	+
BasR	dgkA[dgkA]	+
BasR	fimB[fimB]	+
BasR	qseBC[qseB, qseC]	+
BasR	tomB-hha[hha, tomB]	+
BasR	putA[putA]				+
BasR	yrbL[yrbL]				+
BetI	betIBA[betA, betB, betI]						+
BetI	betT[betT]						+
BglJ	bglGFB[bglB, bglF, bglG]	+
BglJ	leuO[leuO]	+
BirA	bioA[bioA]				+
BirA	bioBFCD[bioB, bioC, bioD, bioF]				+
BluR	ycgZ-ymgA-ariR-ymgC[ariR, ycgZ, ymgA, ymgC]				+
BolA	ampC[ampC]	+			+
BolA	dacC[dacC]	+			+
CadC	cadBA[cadA, cadB]		+
CadC	cadC[cadC]		+
CaiF	caiTABCDE[caiA, caiB, caiC, caiD, caiE, caiT]	+
CaiF	fixABCX[fixA, fixB, fixC, fixX]	+
Cbl	ssuEADCB[ssuA, ssuB, ssuC, ssuD, ssuE]	+
Cbl	tauABCD[tauA, tauB, tauC, tauD]	+
CdaR	cdaR[cdaR]		+
CdaR	garD[garD]		+
CdaR	garPLRK-rnpB[garK, garL, garP, garR, rnpB]		+
CdaR	gudPXD[gudD, gudP, gudX]		+
ChbR	chbBCARFG[chbA, chbB, chbC, chbF, chbG, chbR]		+	+		+	+
ComR	bhsA[bhsA]				+
CpxR	acrD[acrD]		+
CpxR	aroG[aroG]		+
CpxR	bacA[bacA]		+
CpxR	bamA-hlpA-lpxD-fabZ-lpxAB-rnhB-dnaE[fabZ, hlpA, lpxA, lpxD]		+
CpxR	cpxP[cpxP]		+
CpxR	cpxRA[cpxA, cpxR]		+
CpxR	degP[degP]		+
CpxR	dgcZ[dgcZ]		+
CpxR	ftnB[ftnB]		+
CpxR	mdtABCD-baeSR[baeR, baeS, mdtA, mdtB, mdtC, mdtD]		+
CpxR	ompC[ompC]		+
CpxR	ppiA[ppiA]		+
CpxR	ppiD[ppiD]		+
CpxR	rdoA-dsbA[dsbA, rdoA]		+
CpxR	rpoH[rpoH]		+
CpxR	sbmA-yaiW[sbmA, yaiW]		+
CpxR	slt[slt]		+
CpxR	spy[spy]		+
CpxR	tomB-hha[hha, tomB]		+
CpxR	xerD-dsbC-recJ-prfB-lysS[dsbC]		+
CpxR	yccA[yccA]		+
CpxR	ycfS[ycfS]		+
CpxR	yebE[yebE]		+
CpxR	ygaU[ygaU]		+
CpxR	yidQ[yidQ]		+
CpxR	yqaE[yqaE]		+
CpxR	yqjA-mzrA[mzrA, yqjA]		+
CpxR	bamE[bamE]					+
CpxR	csgBAC[csgA, csgB, csgC]					+
CpxR	csgDEFG[csgD, csgE, csgF, csgG]					+
CpxR	efeU_1U_2[efeU_1, efeU_2]					+
CpxR	motAB-cheAW[cheA, cheW, motA, motB]					+
CpxR	ompF[ompF]					+
CpxR	psd-mscM[mscM, psd]					+
CpxR	rpoE-rseABC[rpoE, rseA, rseB, rseC]					+
CpxR	tsr[tsr]					+
CpxR	ung[ung]					+
Cra	aceBAK[aceA, aceB, aceK]	+
Cra	acnA[acnA]	+
Cra	aroP[aroP]	+
Cra	betIBA[betA, betB, betI]	+
Cra	betT[betT]	+
Cra	csgDEFG[csgD, csgE, csgF, csgG]	+
Cra	cydAB[cydA, cydB]	+
Cra	icd[icd]	+
Cra	pck[pck]	+
Cra	poxB-ltaE-ybjT[poxB]	+
Cra	ppsA[ppsA]	+
Cra	ptsHI-crr[crr, ptsH, ptsI]	+
Cra	acnB[acnB]				+
Cra	adhE[adhE]				+
Cra	cyoABCDE[cyoA, cyoB, cyoC, cyoD, cyoE]				+
Cra	edd-eda[eda, edd]				+
Cra	epd-pgk-fbaA[epd, fbaA, pgk]				+
Cra	fbaB[fbaB]				+
Cra	fruBKA[fruA, fruB, fruK]				+
Cra	gapA-yeaD[gapA, yeaD]				+
Cra	glcC[glcC]				+
Cra	glk[glk]				+
Cra	gpmM-envC-yibQ[envC, gpmM, yibQ]				+
Cra	hydN-hypF[hypF]				+
Cra	manXYZ[manX, manY, manZ]				+
Cra	marRAB[marA, marB, marR]				+
Cra	mpl[mpl]				+
Cra	mtlADR[mtlA, mtlD, mtlR]				+
Cra	nirBDC-cysG[cysG, nirB, nirC, nirD]				+
Cra	pdhR-aceEF-lpd[aceE, aceF, lpd, pdhR]				+
Cra	pfkA[pfkA]				+
Cra	ppc[ppc]				+
Cra	prpBCDE[prpB, prpC, prpD, prpE]				+
Cra	ptsHI-crr[crr, ptsH, ptsI]				+
Cra	pykF[pykF]				+
Cra	pyrG-eno[eno]				+
Cra	sgrST-setA[setA, sgrS, sgrT]				+
Cra	tpiA[tpiA]				+
Cra	yahA[yahA]				+
Cra	zwf[zwf]				+
CreB	creABCD[creD]	+			+
CreB	talA-tktB[talA]	+
CreB	malEFG[malE, malF, malG]				+
CRP	aaeXAB[aaeA, aaeB, aaeX]		+	+
CRP	acnA[acnA]		+	+
CRP	acnB[acnB]		+	+
CRP	acs-yjcH-actP[acs, actP, yjcH]		+	+
CRP	aer[aer]		+	+
CRP	agp[agp]		+	+
CRP	aldA[aldA]		+	+
CRP	aldB[aldB]		+	+
CRP	ansB[ansB]		+	+
CRP	araBAD[araA, araB, araD]		+	+
CRP	araC[araC]		+	+
CRP	araE[araE]		+	+
CRP	araFGH[araF, araG, araH]		+	+
CRP	araJ[araJ]		+	+		+	+
CRP	argG[argG]		+	+
CRP	ascFB[ascB, ascF]		+	+
CRP	aspA-dcuA[aspA, dcuA]		+	+
CRP	bglGFB[bglB, bglF, bglG]		+	+
CRP	caiF[caiF]		+	+
CRP	caiTABCDE[caiA, caiB, caiC, caiD, caiE, caiT]		+	+
CRP	cdd[cdd]		+	+		+	+
CRP	chbBCARFG[chbA, chbB, chbC, chbF, chbG, chbR]		+	+
CRP	cirA[cirA]		+	+
CRP	cpdB[cpdB]		+	+
CRP	crp[crp]		+	+		+	+
CRP	csgDEFG[csgD, csgE, csgF, csgG]		+	+
CRP	csiD-lhgO-gabDTP[csiD, gabD, gabP, gabT, lhgO]		+	+
CRP	csiE[csiE]		+	+
CRP	cspE[cspE]		+	+
CRP	cstA[cstA]		+	+
CRP	cyaR[cyaR]		+	+
CRP	cyoABCDE[cyoA, cyoB, cyoC, cyoD, cyoE]		+	+
CRP	cytR[cytR]		+	+		+	+
CRP	dadAX[dadA, dadX]		+	+		+	+
CRP	dctA[dctA]		+	+
CRP	dcuB-fumB[dcuB, fumB]		+	+
CRP	dcuSR[dcuR]		+	+
CRP	deoCABD[deoA, deoB, deoC, deoD]		+	+
CRP	feaB[feaB]		+	+		+	+
CRP	dsdXA[dsdA, dsdX]		+	+
CRP	dusB-fis[dusB, fis]		+	+		+	+
CRP	ebgAC[ebgA, ebgC]		+	+
CRP	entCEBAH[entA, entB, entC, entE, entH]		+	+
CRP	epd-pgk-fbaA[epd, fbaA, pgk]		+	+
CRP	exuT[exuT]		+	+
CRP	fadD-sroD[fadD, sroD]		+	+
CRP	fadH[fadH]		+	+
CRP	fadL[fadL]		+	+
CRP	feaR[feaR]		+	+
CRP	fecABCDE[fecA, fecB, fecC, fecD, fecE]		+	+
CRP	fepA-entD[entD, fepA]		+	+
CRP	fiu[fiu]		+	+
CRP	fixABCX[fixA, fixB, fixC, fixX]		+	+
CRP	fldA-uof-fur[fur]		+	+
CRP	flhDC[flhC, flhD]		+	+
CRP	focA-pflB[focA, pflB]		+	+
CRP	fucAO[fucA, fucO]		+	+
CRP	fucPIKUR[fucI, fucK, fucP, fucR, fucU]		+	+
CRP	fumAC[fumA, fumC]		+	+
CRP	galETKM[galE, galK, galM, galT]		+	+
CRP	galP[galP]		+	+
CRP	galS[galS]		+	+
CRP	gapA-yeaD[gapA]		+	+
CRP	gatYZABCD[gatA, gatB, gatC, gatD, gatY, gatZ]		+	+
CRP	gcvTHP[gcvH, gcvP, gcvT]		+	+
CRP	glcC[glcC]		+	+
CRP	glgBXCAP[glgA, glgC, glgP]		+	+
CRP	glgS[glgS]		+	+
CRP	glnALG[glnA, glnG, glnL]		+	+
CRP	glpABC[glpA, glpB, glpC]		+	+
CRP	glpD[glpD]		+	+
CRP	glpEGR[glpE, glpG, glpR]		+	+
CRP	glpFKX[glpF, glpK, glpX]		+	+
CRP	glpTQ[glpQ, glpT]		+	+
CRP	gltA[gltA]		+	+
CRP	gntP[gntP]		+	+
CRP	gntRKU[gntK, gntU]		+	+
CRP	gntT[gntT]		+	+
CRP	gntX-nfuA[gntX, nfuA]		+	+
CRP	grcA[grcA]		+	+
CRP	grpE[grpE]		+	+
CRP	guaBA[guaA, guaB]		+	+
CRP	gyrA[gyrA]		+	+
CRP	hlyE[hlyE]		+	+
CRP	hofMNOP[hofM, hofN, hofO, hofP]		+	+
CRP	hpt[hpt]		+	+
CRP	hupA[hupA]		+	+
CRP	hupB[hupB]		+	+
CRP	hyfABCDEFGHIJR-focB[focB, hyfA, hyfB, hyfC, hyfD, hyfE, hyfF, hyfG, hyfH, hyfI, hyfJ, hyfR]		+	+
CRP	idnDOTR[idnD, idnO, idnR, idnT]		+	+
CRP	idnK[idnK]		+	+
CRP	ivbL-ilvBN-uhpABC[ilvB, ilvN, ivbL]		+	+
CRP	kbaZ-agaVWA[agaA, agaV, agaW, kbaZ]		+	+
CRP	lacZYA[lacA, lacY, lacZ]		+	+
CRP	lsrACDBFG-tam[lsrA, lsrB, lsrC, lsrD, lsrF, lsrG, tam]		+	+
CRP	lsrRK[lsrK, lsrR]		+	+
CRP	malEFG[malE, malF, malG]		+	+
CRP	malI[malI]		+	+
CRP	malK-lamB-malM[lamB, malK, malM]		+	+
CRP	malS[malS]		+	+
CRP	malT[malT]		+	+
CRP	malXY[malX, malY]		+	+
CRP	manA[manA]		+	+
CRP	manXYZ[manX, manY, manZ]		+	+
CRP	marRAB[marA, marB, marR]		+	+
CRP	mcaS[mcaS]		+	+
CRP	mdh[mdh]		+	+
CRP	melAB[melA, melB]		+	+
CRP	melR[melR]		+	+
CRP	mglBAC[mglA, mglB, mglC]		+	+
CRP	mhpABCDFE[mhpA, mhpB, mhpC, mhpD, mhpE, mhpF]		+	+
CRP	mhpR-lacI[lacI, mhpR]		+	+
CRP	mlc-ynfK[mlc, ynfK]		+	+		+	+
CRP	modABC[modA, modB, modC]		+	+
CRP	mpl[mpl]		+	+
CRP	mtlADR[mtlA, mtlD, mtlR]		+	+
CRP	murQP-yfeW[murP, murQ]		+	+
CRP	mutY-yggX-mltC-nupG[nupG]		+	+		+	+
CRP	nadC[nadC]		+	+
CRP	nagBAC-umpH[nagA, nagB, nagC, umpH]		+	+		+	+
CRP	nagE[nagE]		+	+		+	+
CRP	nanATEK-yhcH[nanA, nanE, nanK, nanT, yhcH]		+	+
CRP	nanCMS[nanC, nanM, nanS]		+	+
CRP	nmpC[nmpC]		+	+
CRP	nrdAB-yfaE[nrdA, nrdB, yfaE]		+	+
CRP	nupC[nupC]		+	+
CRP	ompA[ompA]		+	+
CRP	ompF[ompF]		+	+
CRP	ompR-envZ[envZ, ompR]		+	+		+	+
CRP	oxyR[oxyR]		+	+
CRP	paaABCDEFGHIJK[paaA, paaB, paaC, paaD, paaE, paaF, paaG, paaH, paaI, paaJ, paaK]		+	+
CRP	paaZ[paaZ]		+	+
CRP	pdhR-aceEF-lpd[aceE, aceF, lpd, pdhR]		+	+
CRP	ppdD-hofBC[hofB, hofC, ppdD]		+	+
CRP	ppiA[ppiA]		+	+		+	+
CRP	proP[proP]		+	+		+	+
CRP	prpBCDE[prpB, prpC, prpD, prpE]		+	+
CRP	prpR[prpR]		+	+
CRP	ptsG[ptsG]		+	+
CRP	ptsHI-crr[crr, ptsH, ptsI]		+	+		+	+
CRP	raiA[raiA]		+	+
CRP	rbsDACBKR[rbsA, rbsB, rbsC, rbsD, rbsK, rbsR]		+	+
CRP	relA-mazEFG[mazE, mazF, relA]		+	+
CRP	rhaBAD[rhaA, rhaB, rhaD]		+	+
CRP	rhaSR[rhaR, rhaS]		+	+
CRP	rhaT[rhaT]		+	+
CRP	rmf[rmf]		+	+
CRP	rpoH[rpoH]		+	+		+	+
CRP	rpsF-priB-rpsR-rplI[priB, rplI, rpsF, rpsR]		+	+
CRP	sbmC[sbmC]		+	+
CRP	sdhCDAB-sucABCD[sdhA, sdhB, sdhC, sdhD, sucA, sucB, sucC, sucD]		+	+
CRP	serA[serA]		+	+
CRP	preTA[preA, preT]		+	+
CRP	sfsA-dksA-gluQ[dksA, sfsA]		+	+
CRP	sodA[sodA]		+	+
CRP	srlAEBD-gutM-srlR-gutQ[gutM, gutQ, srlA, srlB, srlD, srlE, srlR]		+	+
CRP	tdcABCDEFG[tdcA, tdcB, tdcC, tdcD, tdcE, tdcF, tdcG]		+	+
CRP	tnaCAB[tnaA, tnaB, tnaC]		+	+
CRP	trg[trg]		+	+
CRP	tsx[tsx]		+	+		+	+
CRP	ubiG[ubiG]		+	+
CRP	udp[udp]		+	+		+	+
CRP	ugpBAECQ[ugpA, ugpB, ugpC, ugpE, ugpQ]		+	+
CRP	uhpT[uhpT]		+	+
CRP	uidABC[uidA, uidB, uidC]		+	+
CRP	ulaABCDEF[ulaA, ulaB, ulaC, ulaD, ulaE, ulaF]		+	+
CRP	uxaB[uxaB]		+	+
CRP	uxaCA[uxaA, uxaC]		+	+
CRP	uxuAB[uxuA, uxuB]		+	+
CRP	uxuR[uxuR]		+	+
CRP	xylAB[xylA, xylB]		+	+
CRP	xylFGHR[xylF, xylG, xylH, xylR]		+	+
CRP	ybiT[ybiT]		+	+
CRP	ycdZ[ycdZ]		+	+
CRP	ychH[ychH]		+	+
CRP	yeiP[yeiP]		+	+
CRP	yeiW[yeiW]		+	+
CRP	yfiP-pka[pka]		+	+
CRP	yhfA[yhfA]		+	+
CRP	yiaKLMNO-lyxK-sgbHUE[lyxK, sgbE, sgbH, sgbU, yiaK, yiaL, yiaM, yiaN, yiaO]		+	+
CRP	yjiY[yjiY]		+	+
CRP	ykgR[ykgR]		+	+
CRP	zraSR[zraR, zraS]		+	+
CRP	aaeR[aaeR]					+	+
CRP	aceBAK[aceA, aceB, aceK]					+	+
CRP	bhsA[bhsA]					+	+
CRP	citCDEFXG[citC, citD, citE, citF, citG, citX]					+	+
CRP	comR[comR]					+	+
CRP	cyaA[cyaA]					+	+
CRP	dpiBA[dpiA, dpiB]					+	+
CRP	gadAXW[gadA, gadX]					+	+
CRP	gadBC[gadB, gadC]					+	+
CRP	gadE-mdtEF[gadE, mdtE, mdtF]					+	+
CRP	gcd[gcd]					+	+
CRP	gdhA[gdhA]					+	+
CRP	gltBDF[gltB, gltD, gltF]					+	+
CRP	metK[metK]					+	+
CRP	metY-rimP-nusA-infB-rbfA-truB-rpsO-pnp[infB, metY, nusA, pnp, rbfA, rimP, rpsO, truB]					+	+
CRP	narQ[narQ]					+	+
CRP	nirBDC-cysG[cysG, nirB, nirC, nirD]					+	+
CRP	osmY[osmY]					+	+
CRP	pdhR-aceEF-lpd[lpd]					+	+
CRP	pncB[pncB]					+	+
CRP	psiE[psiE]					+	+
CRP	putP[putP]					+	+
CRP	puuDRCBE[puuB, puuC, puuD, puuE, puuR]					+	+
CRP	rplM-rpsI[rplM, rpsI]					+	+
CRP	serC-aroA[aroA, serC]					+	+
CRP	sodB[sodB]					+	+
CRP	sohB[sohB]					+	+
CRP	speC[speC]					+	+
CRP	spf[spf]					+	+
CRP	treBC[treB, treC]					+	+
CRP	trxA[trxA]					+	+
CRP	xseA[xseA]					+	+
CRP	yaeP-rof[rof, yaeP]					+	+
CRP	yaeQ-arfB-nlpE[arfB, nlpE, yaeQ]					+	+
CRP	ybiS[ybiS]					+	+
CRP	yhfA[yhfA]					+	+
CRP	yiaJ[yiaJ]					+	+
CRP	yjeF-tsaE-amiB-mutL-miaA-hfq-hflXKC[hflC, hflK, hflX, hfq]					+	+
CsgD	adrA[adrA]		+
CsgD	csgBAC[csgA, csgB, csgC]		+
CsgD	csgDEFG[csgD, csgE, csgF, csgG]		+
CsgD	iraP[iraP]		+
CsgD	nlpA[nlpA]		+
CsgD	wrbA-yccJ[wrbA, yccJ]		+
CsgD	yccT[yccT]		+
CsgD	fliE[fliE]					+
CsgD	fliFGHIJK[fliF, fliG, fliH, fliI, fliJ, fliK]					+
CsgD	pepD[pepD]					+
CsgD	yhbTS[yhbS, yhbT]					+
CsiR	csiD-lhgO-gabDTP[csiD, gabD, gabP, gabT, lhgO]				+
CspA	gyrA[gyrA]	+
CspA	hns[hns]	+
CueR	copA[copA]	+
CueR	cueO[cueO]	+
CueR	moaABCDE[moaA, moaB, moaC, moaD, moaE]				+
CusR	cusCFBA[cusA, cusB, cusC, cusF]		+
CusR	cusRS[cusR, cusS]		+
CynR	cynR[cynR]						+
CynR	cynTSX[cynS, cynT, cynX]			+
CysB	cbl[cbl]			+
CysB	cysDNC[cysC, cysD, cysN]			+
CysB	cysJIH[cysH, cysI, cysJ]			+
CysB	cysK[cysK]			+
CysB	cysPUWAM[cysA, cysM, cysP, cysU, cysW]			+
CysB	tauABCD[tauA, tauB, tauC, tauD]			+
CysB	cysB[cysB]						+
CysB	hslJ[hslJ]						+
CysB	ssuEADCB[ssuA, ssuB, ssuC, ssuD, ssuE]						+
CytR	cdd[cdd]						+
CytR	cytR[cytR]						+
CytR	deoCABD[deoA, deoB, deoC, deoD]						+
CytR	mutY-yggX-mltC-nupG[nupG]						+
CytR	nupC[nupC]						+
CytR	ppiA[ppiA]						+
CytR	rpoH[rpoH]						+
CytR	tsx[tsx]						+
CytR	udp[udp]						+
CytR	ycdZ[ycdZ]						+
Dan	ttdABT[ttdA, ttdB, ttdT]		+
Dan	ttdR[ttdR]		+
DcuR	dctA[dctA]	+
DcuR	dcuB-fumB[dcuB, fumB]	+
DcuR	dpiBA[dpiA, dpiB]	+
DcuR	frdABCD[frdA, frdB, frdC, frdD]	+
DeoR	deoCABD[deoA, deoB, deoC, deoD]				+
DeoR	mutY-yggX-mltC-nupG[nupG]				+
DeoR	tsx[tsx]				+
DhaR	dhaKLM[dhaK, dhaL, dhaM]			+
DhaR	dhaR[dhaR]						+
DicA	dicB-ydfDE-insD-intQ[dicB, insD, intQ, ydfD, ydfE]				+
DicA	dicC-ydfXW[dicC, ydfW, ydfX]				+
DinJ	cspE[cspE]						+
DinJ	dinJ-yafQ[dinJ, yafQ]						+
DnaA	aldA[aldA]					+	+
DnaA	dnaAN-recF[dnaA, dnaN, recF]		+	+		+	+
DnaA	guaBA[guaA, guaB]					+	+
DnaA	nrdAB-yfaE[nrdA, nrdB, yfaE]		+	+		+	+
DnaA	polA[polA]		+	+
DnaA	rpoH[rpoH]					+	+
DnaA	yjeV[yjeV]					+	+
DpiA	citCDEFXG[citC, citD, citE, citF, citG, citX]		+
DpiA	dpiBA[dpiA, dpiB]		+
DpiA	exuT[exuT]		+
DpiA	mdh[mdh]		+
DpiA	appY[appY]					+
DsdC	dsdC[dsdC]						+
DsdC	dsdXA[dsdA, dsdX]			+
EbgR	ebgAC[ebgA, ebgC]				+
EnvR	acrAB[acrA, acrB]				+
EnvY	ompC[ompC]	+
EnvY	ompF[ompF]	+
EvgA	acrD[acrD]		+
EvgA	emrKY[emrK, emrY]		+
EvgA	evgAS[evgA, evgS]		+
EvgA	gadE-mdtEF[gadE, mdtE, mdtF]		+
EvgA	safA-ydeO[safA, ydeO]		+
EvgA	ydeP[ydeP]		+
EvgA	yegRZ[yegR, yegZ]		+
EvgA	yfdX-frc-oxc-yfdVE[frc, oxc, yfdE, yfdV, yfdX]		+
ExuR	exuR[exuR]						+
ExuR	exuT[exuT]						+
ExuR	uxaB[uxaB]						+
ExuR	uxaCA[uxaA, uxaC]						+
ExuR	uxuAB[uxuA, uxuB]						+
ExuR	uxuR[uxuR]						+
FabR	fabA[fabA]				+
FabR	fabB[fabB]				+
FadR	fabA[fabA]		+
FadR	fabB[fabB]		+
FadR	fadR[fadR]		+
FadR	iclR[iclR]		+
FadR	yceD-rpmF-plsX-fabHDG-acpP-fabF[fabD, fabG, fabH]		+
FadR	uspA[uspA]					+
FadR	fadBA[fadA, fadB]					+
FadR	fadD-sroD[fadD, sroD]					+
FadR	fadE[fadE]					+
FadR	fadH[fadH]					+
FadR	fadIJ[fadI, fadJ]					+
FadR	fadL[fadL]					+
FadR	fadM[fadM]					+
FeaR	feaB[feaB]	+
FeaR	tynA[tynA]	+
FhlA	fdhF[fdhF]		+
FhlA	hycABCDEFGHI[hycA, hycB, hycC, hycD, hycE, hycF, hycG, hycH, hycI]		+
FhlA	hydN-hypF[hydN, hypF]		+
FhlA	hyfABCDEFGHIJR-focB[focB, hyfA, hyfB, hyfC, hyfD, hyfE, hyfF, hyfG, hyfH, hyfI, hyfJ, hyfR]		+
FhlA	hypABCDE-fhlA[fhlA, hypA, hypB, hypC, hypD, hypE]		+
Fis	abgABT-ogt[ogt]						+
Fis	acnB[acnB]						+
Fis	acs-yjcH-actP[acs, actP, yjcH]						+
Fis	aldB[aldB]						+
Fis	ansB[ansB]						+
Fis	bglGFB[bglB, bglF, bglG]						+
Fis	cbpAM[cbpA, cbpM]						+
Fis	crp[crp]						+
Fis	cspI[cspI]						+
Fis	dcuB-fumB[fumB]						+
Fis	dmsABC[dmsA, dmsB, dmsC]						+
Fis	dps[dps]						+
Fis	focA-pflB[pflB]						+
Fis	gadAXW[gadA, gadX]						+
Fis	gadBC[gadB, gadC]						+
Fis	garPLRK-rnpB[rnpB]						+
Fis	glcC[glcC]						+
Fis	glnHPQ[glnQ]						+
Fis	gltX[gltX]						+
Fis	guaBA[guaA, guaB]						+
Fis	gyrA[gyrA]						+
Fis	gyrB[gyrB]						+
Fis	hlyE[hlyE]						+
Fis	hupB[hupB]						+
Fis	hyaABCDEF[hyaA, hyaB, hyaC, hyaD, hyaE, hyaF]						+
Fis	katE[katE]						+
Fis	mglBAC[mglA, mglC]						+
Fis	msrA[msrA]						+
Fis	mtlADR[mtlA, mtlD, mtlR]						+
Fis	nanATEK-yhcH[nanA, nanE, nanK, nanT, yhcH]						+
Fis	narGHJI[narG, narH, narI, narJ]						+
Fis	narK[narK]						+
Fis	ndh[ndh]						+
Fis	nirBDC-cysG[cysG, nirB, nirC, nirD]						+
Fis	nrfABCDEFG[nrfA, nrfB, nrfC, nrfD, nrfE, nrfF, nrfG]						+
Fis	osmE[osmE]						+
Fis	osmY[osmY]						+
Fis	ptsG[ptsG]			+			+
Fis	pyrD[pyrD]						+
Fis	rplM-rpsI[rplM, rpsI]						+
Fis	topA[topA]						+
Fis	xylFGHR[xylF, xylG, xylH, xylR]						+
Fis	yeaR-yoaG[yeaR, yoaG]						+
Fis	fis						+
Fis	ssrS-fau[fau, ssrS]			+			+
Fis	adhE[adhE]			+
Fis	alaWX[alaW, alaX]			+
Fis	argU[argU]			+
Fis	argW[argW]			+
Fis	argX-hisR-leuT-proM[argX, hisR, leuT, proM]			+
Fis	aspV[aspV]			+
Fis	bdm-sra[sra]			+
Fis	carAB[carA, carB]			+
Fis	deoCABD[deoA, deoB, deoC, deoD]			+
Fis	fadBA[fadA, fadB]			+
Fis	flxA[flxA]			+
Fis	garPLRK-rnpB[rnpB]			+
Fis	glnALG[glnA, glnG, glnL]			+
Fis	glpABC[glpA, glpB, glpC]			+
Fis	glpTQ[glpQ, glpT]			+
Fis	glyU[glyU]			+
Fis	grcA[grcA]			+
Fis	hns[hns]			+
Fis	hupA[hupA]			+
Fis	leuQPV[leuP, leuQ, leuV]			+
Fis	leuX[leuX]			+
Fis	lptD-surA-pdxA-rsmA-apaGH[apaG, apaH, pdxA, rsmA]			+
Fis	lysT-valT-lysW[lysT, lysW, valT]			+
Fis	malEFG[malE, malF, malG]			+
Fis	marRAB[marA, marB, marR]			+
Fis	metT-leuW-glnUW-metU-glnVX[glnU, glnV, glnW, glnX, leuW, metT, metU]			+
Fis	metY-rimP-nusA-infB-rbfA-truB-rpsO-pnp[infB, metY, nusA, pnp, rbfA, rimP, rpsO, truB]			+
Fis	ndh[ndh]			+
Fis	nrdAB-yfaE[nrdA, nrdB, yfaE]			+
Fis	nuoABCEFGHIJKLMN[nuoA, nuoB, nuoC, nuoE, nuoF, nuoG, nuoH, nuoI, nuoJ, nuoK, nuoL, nuoM, nuoN]			+
Fis	pdhR-aceEF-lpd[lpd]			+
Fis	pheU[pheU]			+
Fis	pheV[pheV]			+
Fis	proK[proK]			+
Fis	proL[proL]			+
Fis	proP[proP]			+
Fis	ptsG[ptsG]			+
Fis	queA[queA]			+
Fis	relA-mazEFG[mazE, mazF, mazG]			+
Fis	rrsA-ileT-alaT-rrlA-rrfA[alaT, ileT, rrfA, rrlA, rrsA]			+
Fis	rrsB-gltT-rrlB-rrfB[gltT, rrfB, rrlB, rrsB]			+
Fis	rrsC-gltU-rrlC-rrfC[gltU, rrfC, rrlC, rrsC]			+
Fis	rrsD-ileU-alaU-rrlD-rrfD-thrV-rrfF[alaU, ileU, rrfD, rrfF, rrlD, rrsD, thrV]			+
Fis	rrsE-gltV-rrlE-rrfE[gltV, rrfE, rrlE, rrsE]			+
Fis	rrsG-gltW-rrlG-rrfG[gltW, rrfG, rrlG, rrsG]			+
Fis	rrsH-ileV-alaV-rrlH-rrfH[alaV, ileV, rrfH, rrlH, rrsH]			+
Fis	serT[serT]			+
Fis	serX[serX]			+
Fis	thrU-tyrU-glyT-thrT-tufB[glyT, thrT, thrU, tufB, tyrU]			+
Fis	thrW[thrW]			+
Fis	topA[topA]			+
Fis	trg[trg]			+
Fis	trmA[trmA]			+
Fis	tyrTV-tpr[tpr, tyrT, tyrV]			+
Fis	valUXY-lysV[lysV, valU, valX, valY]			+
FlhDC	flgAMN[flgA, flgM, flgN]	+
FlhDC	flgBCDEFGHIJ[flgB, flgC, flgD, flgE, flgF, flgG, flgH, flgI, flgJ]	+
FlhDC	flhBAE[flhA, flhB, flhE]	+
FlhDC	fliAZY[fliA, fliY, fliZ]	+
FlhDC	fliDST[fliD, fliS, fliT]	+
FlhDC	fliE[fliE]	+
FlhDC	fliFGHIJK[fliF, fliG, fliH, fliI, fliJ, fliK]	+
FlhDC	fliLMNOPQR[fliL, fliM, fliN, fliO, fliP, fliQ, fliR]	+
FlhDC	glpABC[glpA, glpB, glpC]	+
FlhDC	gltI-sroC-gltJKL[gltI, gltJ, gltK, gltL, sroC]	+
FlhDC	hydN-hypF[hydN, hypF]	+
FlhDC	napFDAGHBC-ccmABCDEFGH[ccmA, ccmB, ccmC, ccmD, ccmE, ccmF, ccmG, ccmH, napA, napB, napC, napD, napF, napG, napH]	+
FlhDC	nrfABCDEFG[nrfA, nrfB, nrfC, nrfD, nrfE, nrfF, nrfG]	+
FlhDC	ppdAB-ygdB-ppdC-recC[ppdA, ppdB, ppdC, recC, ygdB]	+
FlhDC	ycgR[ycgR]	+
FlhDC	yecR[yecR]	+
FlhDC	ygbJK[ygbK]	+
FlhDC	yhjH[yhjH]	+
FlhDC	mdh[mdh]				+
FlhDC	mglBAC[mglA, mglB, mglC]				+
FliZ	csgBAC[csgA, csgB, csgC]				+
FliZ	csgDEFG[csgD, csgE, csgF, csgG]				+
FliZ	flhDC[flhC, flhD]				+
FliZ	gadBC[gadB, gadC]				+
FliZ	gadE-mdtEF[gadE, mdtE, mdtF]				+
FliZ	gmr[gmr]				+
FliZ	hdeAB-yhiD[hdeA, hdeB, yhiD]				+
FliZ	mlrA[mlrA]				+
FliZ	osmY[osmY]				+
FNR	acnA[acnA]						+
FNR	aldA[aldA]						+
FNR	arcA[arcA]						+
FNR	citCDEFXG[citC, citD, citE, citF, citG, citX]						+
FNR	cyoABCDE[cyoA, cyoB, cyoC, cyoD, cyoE]						+
FNR	dpiBA[dpiA, dpiB]						+
FNR	dppABCDF[dppA, dppB, dppC, dppD, dppF]						+
FNR	fnr[fnr]						+
FNR	fumAC[fumA, fumC]						+
FNR	gadAXW[gadA, gadW, gadX]						+
FNR	gltBDF[gltB, gltD, gltF]						+
FNR	gnd[gnd]						+
FNR	hemA-prfA-prmC[hemA, prfA, prmC]						+
FNR	hmp[hmp]						+
FNR	moeAB[moeA, moeB]						+
FNR	nac[nac]						+
FNR	narXL[narL, narX]						+
FNR	ndh[ndh]						+
FNR	norVW[norV, norW]						+
FNR	nuoABCEFGHIJKLMN[nuoA, nuoB, nuoC, nuoE, nuoF, nuoG, nuoH, nuoI, nuoJ, nuoK, nuoL, nuoM, nuoN]						+
FNR	ompX[ompX]						+
FNR	purMN[purM, purN]						+
FNR	puuAP[puuA, puuP]						+
FNR	rplM-rpsI[rplM, rpsI]						+
FNR	rpsP-rimM-trmD-rplS[rimM, rplS, rpsP, trmD]						+
FNR	sdhCDAB-sucABCD[sdhA, sdhB, sdhC, sdhD, sucA, sucB, sucC, sucD]						+
FNR	sodA[sodA]						+
FNR	soxR[soxR]						+
FNR	soxS[soxS]						+
FNR	thrS-infC-rpmI-rplT-pheMST-ihfA[pheM, rplT]						+
FNR	tpx[tpx]						+
FNR	ubiCA[ubiA, ubiC]						+
FNR	ychO[ychO]						+
FNR	yeiL[yeiL]						+
FNR	ygbA[ygbA]						+
FNR	ysgA[ysgA]						+
FNR	ytfE[ytfE]						+
FNR	zwf[zwf]						+
FNR	ackA-pta[ackA]			+
FNR	acrEF[acrE, acrF]			+
FNR	adhE[adhE]			+
FNR	aer[aer]			+
FNR	ansB[ansB]			+
FNR	arcA[arcA]			+
FNR	aspA-dcuA[aspA, dcuA]			+
FNR	aspC[aspC]			+			+
FNR	bcsABZC[bcsB, bcsZ]			+
FNR	cadC[cadC]			+
FNR	caiF[caiF]			+
FNR	caiTABCDE[caiA, caiB, caiC, caiD, caiE, caiT]			+
FNR	cydAB[cydA, cydB]			+
FNR	cydAB[cydA, cydB]			+			+
FNR	cydDC[cydC, cydD]			+
FNR	dcuB-fumB[dcuB, fumB]			+
FNR	dcuC[dcuC]			+
FNR	dcuSR[dcuR, dcuS]			+
FNR	dmsABC[dmsA, dmsB, dmsC]			+
FNR	emrKY[emrK, emrY]			+
FNR	fdhF[fdhF]			+
FNR	fdnGHI[fdnG, fdnH, fdnI]			+			+
FNR	feoABC[feoA, feoB, feoC]			+
FNR	fes-ybdZ-entF-fepE[entF, fepE, fes, ybdZ]			+
FNR	fixABCX[fixA, fixB, fixC, fixX]			+
FNR	fnrS[fnrS]			+
FNR	focA-pflB[focA, pflB]			+
FNR	frdABCD[frdA, frdB, frdC, frdD]			+
FNR	garPLRK-rnpB[garK, garL, garP, garR, rnpB]			+
FNR	gcvTHP[gcvH, gcvP, gcvT]			+
FNR	gdhA[gdhA]			+
FNR	glnK-amtB[amtB, glnK]			+			+
FNR	glpABC[glpA, glpB, glpC]			+
FNR	glpTQ[glpQ, glpT]			+
FNR	grcA[grcA]			+			+
FNR	hcp-hcr[hcp, hcr]			+
FNR	hlyE[hlyE]			+
FNR	hypABCDE-fhlA[fhlA, hypB, hypC, hypD, hypE]			+			+
FNR	iraD[iraD]			+
FNR	iraM[iraM]			+
FNR	katG[katG]			+
FNR	malPQ[malP, malQ]			+
FNR	map-glnD-dapD[glnD]			+			+
FNR	moaABCDE[moaA, moaB, moaC, moaD, moaE]			+
FNR	napFDAGHBC-ccmABCDEFGH[ccmA, ccmB, ccmC, ccmD, ccmE, ccmF, ccmG, ccmH, napA, napB, napC, napD, napF, napG, napH]			+
FNR	narGHJI[narG, narH, narI, narJ]			+
FNR	narK[narK]			+
FNR	nikABCDER[nikA, nikB, nikC, nikD, nikE, nikR]			+
FNR	nirBDC-cysG[cysG, nirB, nirC, nirD]			+
FNR	nrdDG[nrdD, nrdG]			+
FNR	nrfABCDEFG[nrfA, nrfB, nrfC, nrfD, nrfE, nrfF, nrfG]			+
FNR	ompW[ompW]			+
FNR	pdhR-aceEF-lpd[aceE, aceF, lpd, pdhR]			+			+
FNR	pepT[pepT]			+
FNR	pitA[pitA]			+
FNR	pstSCAB-phoU[phoU, pstA, pstB, pstC, pstS]			+
FNR	rpsJ-rplCDWB-rpsS-rplV-rpsC-rplP-rpmC-rpsQ[rplB, rplC, rplD, rplP, rplV, rplW, rpmC, rpsC, rpsJ, rpsQ, rpsS]			+
FNR	ssuEADCB[ssuA, ssuB, ssuC, ssuD, ssuE]			+
FNR	tar-tap-cheRBYZ[cheB, cheR, cheY, cheZ, tap, tar]			+
FNR	tdcABCDEFG[tdcA, tdcB, tdcC, tdcD, tdcE, tdcF, tdcG]			+
FNR	upp-uraA[upp, uraA]			+
FNR	uxaCA[uxaA, uxaC]			+
FNR	xdhABC[xdhA, xdhB, xdhC]			+
FNR	ybdN[ybdN]			+
FNR	ydeJ[ydeJ]			+
FNR	ydhYVWXUT[ydhT, ydhU, ydhV, ydhW, ydhX, ydhY]			+
FNR	yecR[yecR]			+
FNR	yfgF[yfgF]			+
FNR	yhjA[yhjA]			+
FNR	ynfEFGH-dmsD[dmsD, ynfE, ynfF, ynfG, ynfH]			+
FNR	yqjI[yqjI]			+
FucR	fucAO[fucA, fucO]		+
FucR	fucPIKUR[fucI, fucK, fucP, fucR, fucU]		+
Fur	aspC[aspC]						+
Fur	cirA[cirA]						+
Fur	cyoABCDE[cyoA, cyoB, cyoC, cyoD, cyoE]						+
Fur	entCEBAH[entA, entB, entC, entE, entH]						+
Fur	exbBD[exbB, exbD]						+
Fur	fecABCDE[fecA, fecB, fecC, fecD, fecE]						+
Fur	fecIR[fecI, fecR]						+
Fur	feoABC[feoA, feoB, feoC]						+
Fur	fepA-entD[entD, fepA]						+
Fur	fepB[fepB]						+
Fur	fepDGC[fepC, fepD, fepG]						+
Fur	fes-ybdZ-entF-fepE[entF, fepE, fes, ybdZ]						+
Fur	fhuACDB[fhuA, fhuB, fhuC, fhuD]						+
Fur	fhuE[fhuE]						+
Fur	fhuF[fhuF]						+
Fur	fiu[fiu]						+
Fur	fldA-uof-fur[fur]						+
Fur	flhDC[flhC, flhD]						+
Fur	fnr[fnr]						+
Fur	fumAC[fumC]						+
Fur	garPLRK-rnpB[garK, garL, garP, garR, rnpB]						+
Fur	gltBDF[gltB, gltD, gltF]						+
Fur	gnd[gnd]						+
Fur	gpmA[gpmA]						+
Fur	grcA[grcA]						+
Fur	gspCDEFGHIJKLMO[gspC, gspD, gspE, gspF, gspG, gspH, gspI, gspJ, gspK, gspL, gspM, gspO]						+
Fur	hmp[hmp]						+
Fur	map-glnD-dapD[glnD]						+
Fur	metH[metH]						+
Fur	metJ[metJ]						+
Fur	mntH[mntH]						+
Fur	nac[nac]						+
Fur	ndh[ndh]						+
Fur	nlpD-rpoS[rpoS]						+
Fur	nohA-ydfN-tfaQ[nohA, tfaQ, ydfN]						+
Fur	nrdHIEF[nrdE, nrdF, nrdH, nrdI]						+
Fur	oppABCDF[oppA, oppB, oppC, oppD, oppF]						+
Fur	purR[purR]						+
Fur	pyrC[pyrC]						+
Fur	rcnAB[rcnA, rcnB]						+
Fur	ryhB[ryhB]						+
Fur	sodA[sodA]						+
Fur	soxR[soxR]						+
Fur	soxS[soxS]						+
Fur	sufABCDSE[sufA, sufB, sufC, sufD, sufE, sufS]						+
Fur	tonB[tonB]			+			+
Fur	ygaC[ygaC]						+
Fur	yhhY[yhhY]						+
Fur	yjjZ[yjjZ]						+
Fur	yqjH[yqjH]						+
Fur	zwf[zwf]						+
Fur	dcuB-fumB[fumB]			+
Fur	entS[entS]			+			+
Fur	ftnA[ftnA]			+
Fur	gdhA[gdhA]			+			+
Fur	glnK-amtB[amtB, glnK]			+			+
Fur	katE[katE]			+
Fur	katG[katG]			+
Fur	mntP[mntP]			+
Fur	ompF[ompF]			+
Fur	pdhR-aceEF-lpd[lpd]			+			+
Fur	sdhCDAB-sucABCD[sdhA, sdhB, sdhC, sdhD, sucA, sucB, sucC, sucD]			+
Fur	zinT[zinT]			+
GadE	bamA-hlpA-lpxD-fabZ-lpxAB-rnhB-dnaE[fabZ, hlpA, lpxA, lpxD]		+
GadE	cyoABCDE[cyoA, cyoB, cyoC, cyoD, cyoE]		+
GadE	fliC[fliC]		+
GadE	gadAXW[gadW, gadX]		+
GadE	gadBC[gadB, gadC]		+
GadE	gadE-mdtEF[gadE, mdtE, mdtF]		+
GadE	gltBDF[gltB, gltD, gltF]		+
GadE	gnd[gnd]		+
GadE	hdeAB-yhiD[hdeA, hdeB, yhiD]		+
GadE	hdeD[hdeD]		+
GadE	lrp[lrp]		+
GadE	purA[purA]		+
GadE	rcsA[rcsA]		+
GadE	adiC[adiC]		+
GadE	aslB[aslB]		+
GadE	cadBA[cadA, cadB]		+
GadE	slp-dctR[dctR, slp]		+
GadE	yhiM[yhiM]		+
GadW	gadAXW[gadW, gadX]			+			+
GadW	gadBC[gadB, gadC]			+			+
GadW	gadE-mdtEF[gadE, mdtE, mdtF]			+
GadW	gadY[gadY]						+
GadW	hdeAB-yhiD[hdeA, hdeB, yhiD]			+			+
GadW	slp-dctR[dctR, slp]						+
GadX	asnB[asnB]		+
GadX	cadBA[cadA, cadB]		+
GadX	clpPX-lon[lon]		+
GadX	gadAXW[gadA, gadW, gadX]		+			+
GadX	gadBC[gadB, gadC]		+
GadX	gadE-mdtEF[gadE, mdtE, mdtF]		+
GadX	gadY[gadY]		+
GadX	glnK-amtB[amtB, glnK]		+
GadX	hdeAB-yhiD[hdeA, hdeB, yhiD]		+			+
GadX	hdeD[hdeD]		+
GadX	hns[hns]		+
GadX	nlpD-rpoS[rpoS]		+
GadX	slp-dctR[dctR, slp]		+
GadX	uspE[uspE]		+
GadX	ybaST[ybaS, ybaT]		+
GadX	btuB-murI[btuB, murI]					+
GalR	galETKM[galE, galK, galM, galT]			+			+
GalR	galP[galP]						+
GalR	galR[galR]						+
GalR	galS[galS]						+
GalR	mglBAC[mglA, mglB, mglC]						+
GalS	galETKM[galE, galK, galM, galT]			+			+
GalS	galP[galP]						+
GalS	galR[galR]						+
GalS	galS[galS]						+
GalS	mglBAC[mglA, mglB, mglC]						+
GatR	gatYZABCD[gatA, gatB, gatC, gatD, gatY, gatZ]				+
GcvA	gcvA[gcvA]						+
GcvA	gcvB[gcvB]			+
GcvA	gcvTHP[gcvH, gcvP, gcvT]			+			+
GlcC	glcC[glcC]						+
GlcC	glcDEFGBA[glcA, glcB, glcD, glcE, glcF, glcG]			+
GlpR	glpABC[glpA, glpB, glpC]				+
GlpR	glpD[glpD]				+
GlpR	glpFKX[glpF, glpK, glpX]				+
GlpR	glpTQ[glpQ, glpT]				+
GlrR	glmY[glmY]	+
GntR	edd-eda[eda, edd]				+
GntR	gntRKU[gntK, gntU]				+
GntR	gntT[gntT]				+
GntR	gntX-nfuA[gntX, nfuA]				+
GntR	idnDOTR[idnD, idnO, idnR, idnT]				+
GntR	idnK[idnK]				+
GutM	srlAEBD-gutM-srlR-gutQ[gutM, gutQ, srlA, srlB, srlD, srlE, srlR]		+
GutR	srlAEBD-gutM-srlR-gutQ[gutM, gutQ, srlA, srlB, srlD, srlE, srlR]						+
HcaR	hcaEFCBD[hcaB, hcaC, hcaD, hcaE, hcaF]			+
HcaR	hcaR[hcaR]						+
HdfR	gltBDF[gltB, gltD, gltF]	+
HdfR	flhDC[flhC, flhD]				+
HipB	hipBA[hipA, hipB]						+
H-NS	argT-hisJQMP[hisJ, hisM, hisP, hisQ]			+
H-NS	csiD-lhgO-gabDTP[csiD, gabD, gabP, gabT, lhgO]			+
H-NS	csiE[csiE]			+
H-NS	cspD[cspD]			+
H-NS	fes-ybdZ-entF-fepE[entF, fepE, fes, ybdZ]			+
H-NS	fimAICDFGH[fimA, fimC, fimD, fimF, fimG, fimH, fimI]			+
H-NS	flhDC[flhC, flhD]			+
H-NS	fliAZY[fliA, fliY, fliZ]			+
H-NS	fliC[fliC]			+
H-NS	relA-mazEFG[mazE, mazF, relA]			+
H-NS	smtA-mukFEB[mukB, mukE, mukF, smtA]			+
H-NS	srlAEBD-gutM-srlR-gutQ[gutM, gutQ, srlA, srlB, srlD, srlE, srlR]			+
H-NS	acrEF[acrE, acrF]						+
H-NS	adeD[adeD]						+
H-NS	adiA[adiA]						+
H-NS	adiY[adiY]						+
H-NS	appY[appY]						+
H-NS	asr[asr]						+
H-NS	bglGFB[bglB, bglF, bglG]						+
H-NS	bolA[bolA]						+
H-NS	cadBA[cadA, cadB]						+
H-NS	cadC[cadC]						+
H-NS	caiF[caiF]						+
H-NS	caiTABCDE[caiA, caiB, caiC, caiD, caiE, caiT]						+
H-NS	casABCDE12[cas1, cas2, casA, casB, casC, casD, casE]						+
H-NS	chiA[chiA]						+
H-NS	cydAB[cydA, cydB]						+
H-NS	cysPUWAM[cysA, cysM, cysP, cysU, cysW]						+
H-NS	degP[degP]						+
H-NS	dps[dps]						+
H-NS	evgAS[evgA, evgS]						+
H-NS	fimB[fimB]						+
H-NS	fimE[fimE]						+
H-NS	gadAXW[gadA, gadW, gadX]						+
H-NS	gadE-mdtEF[gadE, mdtE, mdtF]						+
H-NS	galETKM[galE, galK, galM, galT]						+
H-NS	garPLRK-rnpB[garK, garL, garP, garR, rnpB]						+
H-NS	gspAB[gspA, gspB]						+
H-NS	gspCDEFGHIJKLMO[gspC, gspD, gspE, gspF, gspG, gspH, gspI, gspJ, gspK, gspL, gspM, gspO]						+
H-NS	hchA[hchA]						+
H-NS	hdeAB-yhiD[hdeA, hdeB, yhiD]						+
H-NS	hdeD[hdeD]						+
H-NS	hdfR[hdfR]						+
H-NS	hlyE[hlyE]			+			+
H-NS	hns[hns]						+
H-NS	ilvIH[ilvH, ilvI]						+
H-NS	lacZYA[lacA, lacY, lacZ]						+
H-NS	leuO[leuO]						+
H-NS	lrp[lrp]						+
H-NS	micF[micF]						+
H-NS	nhaAR[nhaA, nhaR]						+
H-NS	nirBDC-cysG[cysG, nirB, nirC, nirD]						+
H-NS	nrdAB-yfaE[nrdA, nrdB, yfaE]						+
H-NS	nrdDG[nrdD, nrdG]						+
H-NS	osmC[osmC]						+
H-NS	proVWX[proV, proW, proX]						+
H-NS	rcsA[rcsA]						+
H-NS	rcsDB[rcsB, rcsD]						+
H-NS	rrsB-gltT-rrlB-rrfB[gltT, rrfB, rrlB, rrsB]						+
H-NS	rrsC-gltU-rrlC-rrfC[gltU, rrfC, rrlC, rrsC]						+
H-NS	rrsD-ileU-alaU-rrlD-rrfD-thrV-rrfF[alaU, ileU, rrfD, rrfF, rrlD, rrsD, thrV]						+
H-NS	rrsG-gltW-rrlG-rrfG[gltW, rrfG, rrlG, rrsG]						+
H-NS	rrsH-ileV-alaV-rrlH-rrfH[alaV, ileV, rrfH, rrlH, rrsH]						+
H-NS	safA-ydeO[ydeO]						+
H-NS	slp-dctR[dctR, slp]						+
H-NS	ssrS-fau[fau, ssrS]						+
H-NS	stpA[stpA]						+
H-NS	yciGFE[yciE, yciF, yciG]						+
H-NS	ydeP[ydeP]						+
H-NS	yhiM[yhiM]						+
H-NS	yjjP[yjjP]						+
H-NS	yjjQ-bglJ[bglJ, yjjQ]						+
HU	micF[micF]	+
HU	galETKM[galE, galK, galM, galT]				+
HU	mtr[mtr]				+
HU	seqA-pgm[pgm, seqA]				+
HU	tyrP[tyrP]				+
HyfR	hyfABCDEFGHIJR-focB[focB, hyfA, hyfB, hyfC, hyfD, hyfE, hyfF, hyfG, hyfH, hyfI, hyfJ, hyfR]		+
HypT (YjiE)	cydAB[cydA, cydB]	+
HypT (YjiE)	cysJIH[cysH]	+
HypT (YjiE)	metBL[metB, metL]	+
HypT (YjiE)	metNIQ[metI, metN, metQ]	+
HypT (YjiE)	fecABCDE[fecA, fecB, fecC, fecD, fecE]				+
IclR	aceBAK[aceA, aceB, aceK]						+
IclR	iclR[iclR]						+
IdnR	idnDOTR[idnD, idnO, idnR, idnT]		+
IdnR	idnK[idnK]		+
IdnR	gntRKU[gntK, gntU]					+
IHF	aceBAK[aceA, aceB, aceK]			+
IHF	adiA[adiA]			+
IHF	atoDAEB[atoA, atoB, atoD, atoE]			+
IHF	bdm-sra[sra]			+
IHF	carAB[carA, carB]			+			+
IHF	csgDEFG[csgD, csgE, csgF, csgG]			+
IHF	cysJIH[cysH, cysI, cysJ]			+
IHF	dcuD[dcuD]			+
IHF	dppABCDF[dppA, dppB, dppC, dppD, dppF]			+
IHF	dps[dps]			+
IHF	dusB-fis[dusB, fis]			+
IHF	fimAICDFGH[fimA, fimC, fimD, fimF, fimG, fimH, fimI]			+
IHF	fimB[fimB]			+
IHF	fnr[fnr]			+
IHF	focA-pflB[focA, pflB]			+
IHF	folA[folA]			+
IHF	gcd[gcd]			+
IHF	glcDEFGBA[glcA, glcB, glcD, glcE, glcF, glcG]			+
IHF	glmY[glmY]			+
IHF	glnHPQ[glnH, glnP, glnQ]			+
IHF	gltA[gltA]			+
IHF	gltBDF[gltB, gltD, gltF]			+
IHF	hemA-prfA-prmC[hemA, prfA, prmC]			+
IHF	hipBA[hipA, hipB]			+
IHF	hycABCDEFGHI[hycA, hycB, hycC, hycD, hycE, hycF, hycG, hycH, hycI]			+
IHF	hypABCDE-fhlA[fhlA, hypA, hypB, hypC, hypD, hypE]			+
IHF	ibpAB[ibpB]			+
IHF	ilvLXG_1G_2MEDA[ilvA, ilvD, ilvE, ilvG_1, ilvG_2, ilvL, ilvM, ilvX]			+			+
IHF	narGHJI[narG, narH, narI, narJ]			+
IHF	narK[narK]			+
IHF	nirBDC-cysG[cysG, nirB, nirC, nirD]			+			+
IHF	norVW[norV, norW]			+			+
IHF	paaABCDEFGHIJK[paaA, paaB, paaC, paaD, paaE, paaF, paaG, paaH, paaI, paaJ, paaK]			+
IHF	paaZ[paaZ]			+
IHF	pspABCDE[pspA, pspB, pspC, pspD, pspE]			+
IHF	pspG[pspG]			+
IHF	pstSCAB-phoU[phoU, pstA, pstB, pstC, pstS]			+
IHF	rpoH[rpoH]			+
IHF	rtcBA[rtcA, rtcB]			+
IHF	ssuEADCB[ssuA, ssuB, ssuC, ssuD, ssuE]			+
IHF	sufABCDSE[sufA, sufB, sufC, sufD, sufE, sufS]			+
IHF	tdcABCDEFG[tdcA, tdcB, tdcC, tdcD, tdcE, tdcF, tdcG]			+
IHF	uspA[uspA]			+
IHF	yadV-htrE[htrE, yadV]			+
IHF	yeiL[yeiL]			+
IHF	yiaKLMNO-lyxK-sgbHUE[lyxK, sgbE, sgbH, sgbU, yiaK, yiaL, yiaM, yiaN, yiaO]			+
IHF	yjbEFGH[yjbE, yjbF, yjbG, yjbH]			+
IHF	acs-yjcH-actP[acs, actP, yjcH]						+
IHF	amiA-hemF[amiA, hemF]						+
IHF	cmk-rpsA-ihfB[ihfB]						+
IHF	dmsABC[dmsA, dmsB, dmsC]						+
IHF	flhDC[flhC, flhD]						+
IHF	glpTQ[glpQ, glpT]						+
IHF	hpt[hpt]						+
IHF	micF[micF]						+
IHF	mtr[mtr]						+
IHF	ndh[ndh]						+
IHF	nmpC[nmpC]						+
IHF	nrfABCDEFG[nrfA, nrfB, nrfC, nrfD, nrfE, nrfF, nrfG]			+			+
IHF	nuoABCEFGHIJKLMN[nuoA, nuoB, nuoC, nuoE, nuoF, nuoG, nuoH, nuoI, nuoJ, nuoK, nuoL, nuoM, nuoN]						+
IHF	ompC[ompC]						+
IHF	ompF[ompF]			+			+
IHF	ompR-envZ[envZ, ompR]						+
IHF	osmE[osmE]						+
IHF	osmY[osmY]						+
IHF	sdhCDAB-sucABCD[sucA, sucB, sucC, sucD]						+
IHF	sodA[sodA]						+
IHF	sodB[sodB]						+
IHF	ssuEADCB[ssuA, ssuB, ssuC, ssuD, ssuE]						+
IHF	thrS-infC-rpmI-rplT-pheMST-ihfA[ihfA]						+
IHF	tyrP[tyrP]						+
IHF	ubiCA[ubiA, ubiC]						+
IHF	ulaABCDEF[ulaA, ulaB, ulaC, ulaD, ulaE, ulaF]						+
IHF	ulaG[ulaG]						+
IHF	uspB[uspB]						+
IHF	yiaJ[yiaJ]						+
IlvY	ilvC[ilvC]			+
IlvY	ilvY[ilvY]						+
IscR	erpA[erpA]						+
IscR	gntX-nfuA[nfuA]						+
IscR	hyaABCDEF[hyaA, hyaB, hyaC, hyaD, hyaE, hyaF]						+
IscR	iscRSUA[iscA, iscR, iscS, iscU]						+
IscR	napFDAGHBC-ccmABCDEFGH[napA, napB, napC, napD, napF, napG, napH]						+
IscR	nrdHIEF[nrdE, nrdF, nrdH, nrdI]			+
IscR	rnlAB[rnlA, rnlB]						+
IscR	sufABCDSE[sufA, sufB, sufC, sufD, sufE, sufS]			+
IscR	ydiU[ydiU]			+
KdgR	edd-eda[eda, edd]				+
KdpE	kdpFABC[kdpA, kdpB, kdpC, kdpF]	+
LacI	lacZYA[lacA, lacY, lacZ]				+
LeuO	bglGFB[bglB, bglF, bglG]		+	+
LeuO	casABCDE12[cas1, cas2, casA, casB, casC, casD, casE]		+	+
LeuO	leuLABCD[leuA, leuB, leuC, leuD, leuL]		+	+
LeuO	leuO[leuO]		+	+		+	+
LeuO	yjjQ-bglJ[bglJ, yjjQ]		+	+
LeuO	cadC[cadC]					+	+
LeuO	dsrA[dsrA]					+	+
LexA	cho[cho]						+
LexA	dinB-yafNOP[dinB, yafN, yafO, yafP]						+
LexA	dinD[dinD]						+
LexA	dinG[dinG]						+
LexA	dinI[dinI]						+
LexA	dinJ-yafQ[dinJ, yafQ]						+
LexA	dinQ[dinQ]						+
LexA	ftsK[ftsK]						+
LexA	hokE[hokE]						+
LexA	insK[insK]						+
LexA	lexA-dinF[dinF, lexA]						+
LexA	molR_1[molR_1]						+
LexA	mraZ-rsmH-ftsLI-murEF-mraY-murD-ftsW-murGC-ddlB-ftsQAZ-lpxC[ddlB, ftsA, ftsI, ftsL, ftsQ, ftsW, ftsZ, lpxC, mraY, murC, murD, murE, murF, murG]						+
LexA	polB[polB]						+
LexA	ptrA-recBD[ptrA, recB, recD]						+
LexA	recAX[recA, recX]						+
LexA	recN[recN]						+
LexA	rpsU-dnaG-rpoD[dnaG, rpoD, rpsU]						+
LexA	ruvAB[ruvA, ruvB]						+
LexA	sbmC[sbmC]						+
LexA	ssb[ssb]						+
LexA	sulA[sulA]						+
LexA	symE[symE]						+
LexA	tisB[tisB]						+
LexA	umuDC[umuC, umuD]						+
LexA	uvrA[uvrA]						+
LexA	uvrB[uvrB]						+
LexA	uvrD[uvrD]						+
LexA	uvrYC[uvrC, uvrY]						+
LexA	ybfE[ybfE]						+
LexA	ybgA-phr[phr]						+
LexA	ydjM[ydjM]						+
LexA	yebG[yebG]						+
LldR	lldPRD[lldD, lldP, lldR]		+	+		+	+
LrhA	fimE[fimE]		+
LrhA	lrhA[lrhA]		+
LrhA	flhDC[flhC, flhD]					+
Lrp	adhE[adhE]						+
Lrp	aidB[aidB]						+
Lrp	alaA-yfbR[alaA]						+
Lrp	avtA[avtA]						+
Lrp	dadAX[dadA, dadX]						+
Lrp	hdeAB-yhiD[hdeA, hdeB, yhiD]						+
Lrp	ilvIH[ilvH, ilvI]						+
Lrp	ilvLXG_1G_2MEDA[ilvA, ilvD, ilvE, ilvG_1, ilvG_2, ilvL, ilvM, ilvX]			+			+
Lrp	leuE[leuE]						+
Lrp	livJ[livJ]						+
Lrp	livKHMGF[livF, livG, livH, livK, livM]						+
Lrp	lrp[lrp]						+
Lrp	lysU[lysU]						+
Lrp	micF[micF]						+
Lrp	ompC[ompC]						+
Lrp	oppABCDF[oppA, oppB, oppC, oppD, oppF]						+
Lrp	osmC[osmC]			+			+
Lrp	osmY[osmY]						+
Lrp	rrsA-ileT-alaT-rrlA-rrfA[alaT, ileT, rrfA, rrlA, rrsA]						+
Lrp	rrsB-gltT-rrlB-rrfB[gltT, rrfB, rrlB, rrsB]						+
Lrp	rrsC-gltU-rrlC-rrfC[gltU, rrfC, rrlC, rrsC]						+
Lrp	rrsD-ileU-alaU-rrlD-rrfD-thrV-rrfF[alaU, ileU, rrfD, rrfF, rrlD, rrsD, thrV]						+
Lrp	rrsE-gltV-rrlE-rrfE[gltV, rrfE, rrlE, rrsE]						+
Lrp	rrsG-gltW-rrlG-rrfG[gltW, rrfG, rrlG, rrsG]						+
Lrp	rrsH-ileV-alaV-rrlH-rrfH[alaV, ileV, rrfH, rrlH, rrsH]						+
Lrp	sdaA[sdaA]						+
Lrp	serA[serA]			+			+
Lrp	ssrS-fau[fau, ssrS]						+
Lrp	argO[argO]			+
Lrp	cadBA[cadA, cadB]			+
Lrp	csiD-lhgO-gabDTP[csiD, gabD, gabP, gabT, lhgO]			+
Lrp	fimAICDFGH[fimA, fimC, fimD, fimF, fimG, fimH, fimI]			+
Lrp	fimE[fimE]			+
Lrp	gcvTHP[gcvH, gcvP, gcvT]			+
Lrp	gltBDF[gltB, gltD, gltF]			+
Lrp	kbl-tdh[kbl, tdh]			+
Lrp	lysP[lysP]			+
Lrp	malT[malT]			+
Lrp	serC-aroA[aroA, serC]			+
Lrp	stpA[stpA]			+
Lrp	yeiL[yeiL]			+
Lrp	yojI[yojI]			+
LsrR	lsrACDBFG-tam[lsrA, lsrB, lsrC, lsrD, lsrF, lsrG, tam]						+
LsrR	lsrRK[lsrK, lsrR]						+
LysR	lysA[lysA]			+
LysR	lysR[lysR]						+
MalI	malI[malI]						+
MalI	malXY[malX, malY]						+
MalT	malEFG[malE, malF, malG]	+
MalT	malK-lamB-malM[lamB, malK, malM]	+
MalT	malPQ[malP, malQ]	+
MalT	malS[malS]	+
MalT	malZ[malZ]	+
MarA	acnA[acnA]		+
MarA	acrAB[acrA, acrB]		+
MarA	acrZ[acrZ]		+
MarA	fpr[fpr]		+
MarA	fumAC[fumC]		+
MarA	inaA[inaA]		+
MarA	marRAB[marA, marB, marR]		+
MarA	micF[micF]		+
MarA	nfo[nfo]		+
MarA	nfsB[nfsB]		+
MarA	poxB-ltaE-ybjT[poxB]		+
MarA	pqiAB[pqiA, pqiB]		+
MarA	putA[putA]		+
MarA	sodA[sodA]		+
MarA	tolC-ygiABC[tolC, ygiA, ygiB, ygiC]		+
MarA	waaQGPSBIJYZU[waaY, waaZ]		+
MarA	ybaO[ybaO]		+
MarA	ybjC-nfsA-rimK-ybjN[nfsA, rimK, ybjC, ybjN]		+
MarA	yncE[yncE]		+
MarA	zwf[zwf]		+
MarA	hdeAB-yhiD[hdeA, hdeB, yhiD]					+
MarA	purA[purA]					+
MarA	rob[rob]					+
MarA	slp-dctR[dctR, slp]					+
MarR	marRAB[marA, marB, marR]						+
MatA	ecpA[ecpA]		+
MatA	ecpR[ecpR]		+
MatA	flhDC[flhC, flhD]					+
MatA	fliAZY[fliA, fliY, fliZ]					+
MatA	fliC[fliC]					+
MazE	relA-mazEFG[mazE, mazF, mazG]						+
McbR	yciGFE[yciE, yciF, yciG]	+
McbR	mcbA[mcbA]				+
MelR	melAB[melA, melB]		+	+		+	+
MelR	melR[melR]		+	+		+	+
MetJ	ahpCF[ahpC, ahpF]				+
MetJ	folE-yeiB[folE, yeiB]				+
MetJ	metA[metA]				+
MetJ	metBL[metB, metL]				+
MetJ	metC[metC]				+
MetJ	metE[metE]				+
MetJ	metF[metF]				+
MetJ	metK[metK]				+
MetJ	metNIQ[metI, metN, metQ]				+
MetJ	metR[metR]				+
MetR	glyA[glyA]			+			+
MetR	hmp[hmp]			+
MetR	metE[metE]			+
MetR	metH[metH]			+
MetR	metR[metR]						+
MhpR	mhpABCDFE[mhpA, mhpB, mhpC, mhpD, mhpE, mhpF]	+
Mlc	malT[malT]						+
Mlc	manXYZ[manX, manY, manZ]						+
Mlc	mlc-ynfK[mlc, ynfK]						+
Mlc	ptsG[ptsG]						+
Mlc	ptsHI-crr[crr, ptsH, ptsI]						+
MlrA	cadC[cadC]	+
MlrA	csgDEFG[csgD, csgE, csgF, csgG]	+
MlrA	ibaG-murA[ibaG]	+
MlrA	rplU-rpmA[rplU, rpmA]	+
MngR	mngAB[mngA, mngB]						+
MngR	mngR[mngR]						+
MntR	mntP[mntP]	+
MntR	dps[dps]				+
MntR	mntH[mntH]				+
MntR	rybA-mntS[mntS, rybA]				+
ModE	hycABCDEFGHI[hycA, hycB, hycC, hycD, hycE, hycF, hycG, hycH, hycI]	+
ModE	moaABCDE[moaA, moaB, moaC, moaD, moaE]	+
ModE	napFDAGHBC-ccmABCDEFGH[ccmA, ccmB, ccmC, ccmD, ccmE, ccmF, ccmG, ccmH, napA, napB, napC, napD, napF, napG, napH]	+
ModE	narXL[narL, narX]	+
ModE	deoCABD[deoA, deoB, deoC, deoD]				+
ModE	dmsABC[dmsA, dmsB, dmsC]				+
ModE	modABC[modA, modB, modC]				+
ModE	oppABCDF[oppA, oppB, oppC, oppD, oppF]				+
MprA	acrAB[acrA, acrB]						+
MprA	mprA-emrAB[emrA, emrB, mprA]						+
MprA	nmpC[nmpC]						+
MqsA	cspD[cspD]						+
MqsA	mqsRA[mqsA, mqsR]						+
MqsA	nlpD-rpoS[rpoS]						+
MtlR	mtlADR[mtlA, mtlD, mtlR]						+
MurR	murQP-yfeW[murP, murQ]					+	+
MurR	murR[murR]					+	+
Nac	asnC-mioC-mnmG-rsmG[asnC, mioC, mnmG]						+
Nac	gdhA[gdhA]						+
Nac	gltBDF[gltB, gltD, gltF]						+
Nac	nac[nac]						+
Nac	serA[serA]						+
Nac	codBA[codA, codB]			+
Nac	csiD-lhgO-gabDTP[gabD, gabP, gabT]			+
Nac	feaR[feaR]			+
Nac	nupC[nupC]			+
Nac	ydcSTUV-patD[patD, ydcS, ydcT, ydcU, ydcV]			+
NadR	nadA-pnuC[nadA, pnuC]				+
NadR	nadB[nadB]				+
NadR	pncB[pncB]				+
NagC	chbBCARFG[chbA, chbB, chbC, chbF, chbG, chbR]						+
NagC	chiP-ybfN[chiP, ybfN]						+
NagC	creABCD[creA, creB, creC, creD]						+
NagC	dinI[dinI]						+
NagC	galP[galP]						+
NagC	glmUS[glmS, glmU]			+			+
NagC	manXYZ[manX, manY, manZ]						+
NagC	nagBAC-umpH[nagA, nagB, nagC, umpH]						+
NagC	nagE[nagE]						+
NagC	nanCMS[nanC, nanM, nanS]						+
NagC	ptsHI-crr[crr, ptsH, ptsI]						+
NagC	ydeN[ydeN]						+
NagC	ydeP[ydeP]						+
NagC	fimB[fimB]			+
NanR	fimB[fimB]	+
NanR	nanATEK-yhcH[nanA, nanE, nanK, nanT, yhcH]				+
NanR	nanCMS[nanC, nanM, nanS]				+
NanR	yjhBC[yjhB, yjhC]				+
NarL	abgABT-ogt[ogt]	+
NarL	cydDC[cydC, cydD]	+
NarL	fdnGHI[fdnG, fdnH, fdnI]	+
NarL	hcp-hcr[hcp, hcr]	+
NarL	moeAB[moeA, moeB]	+
NarL	narGHJI[narG, narH, narI, narJ]	+
NarL	narK[narK]	+
NarL	nirBDC-cysG[cysG, nirB, nirC, nirD]	+
NarL	nrfABCDEFG[nrfA, nrfB, nrfC, nrfD, nrfE, nrfF, nrfG]	+			+
NarL	nuoABCEFGHIJKLMN[nuoA, nuoB, nuoC, nuoE, nuoF, nuoG, nuoH, nuoI, nuoJ, nuoK, nuoL, nuoM, nuoN]	+
NarL	yeaR-yoaG[yeaR, yoaG]	+
NarL	ytfE[ytfE]	+
NarL	adhE[adhE]				+
NarL	aspA-dcuA[aspA, dcuA]				+
NarL	caiF[caiF]				+
NarL	citCDEFXG[citC, citD, citE, citF, citG, citX]				+
NarL	dcuB-fumB[dcuB, fumB]				+
NarL	dcuSR[dcuR, dcuS]				+
NarL	dmsABC[dmsA, dmsB, dmsC]				+
NarL	dpiBA[dpiA, dpiB]				+
NarL	fdhF[fdhF]				+
NarL	focA-pflB[focA, pflB]				+
NarL	frdABCD[frdA, frdB, frdC, frdD]				+
NarL	hyaABCDEF[hyaA, hyaB, hyaC, hyaD, hyaE, hyaF]				+
NarL	hybOABCDEFG[hybA, hybB, hybC, hybD, hybE, hybF, hybG, hybO]				+
NarL	napFDAGHBC-ccmABCDEFGH[ccmA, ccmB, ccmC, ccmD, ccmE, ccmF, ccmG, ccmH, napA, napB, napC, napD, napF, napG, napH]				+
NarL	nikABCDER[nikA, nikB, nikC, nikD, nikE, nikR]				+
NarL	norVW[norV, norW]				+
NarL	torCAD[torA, torC, torD]				+
NarL	ubiCA[ubiA, ubiC]				+
NarL	ydhYVWXUT[ydhT, ydhU, ydhV, ydhW, ydhX, ydhY]				+
NarL	ynfEFGH-dmsD[dmsD, ynfE, ynfF, ynfG, ynfH]				+
NarP	fdhF[fdhF]	+
NarP	hcp-hcr[hcp, hcr]	+
NarP	napFDAGHBC-ccmABCDEFGH[ccmA, ccmB, ccmC, ccmD, ccmE, ccmF, ccmG, ccmH, napA, napB, napC, napD, napF, napG, napH]	+			+
NarP	nirBDC-cysG[cysG, nirB, nirC, nirD]	+
NarP	nrfABCDEFG[nrfA, nrfB, nrfC, nrfD, nrfE, nrfF, nrfG]	+
NarP	yeaR-yoaG[yeaR, yoaG]	+
NarP	ytfE[ytfE]	+
NarP	fdnGHI[fdnG, fdnH, fdnI]				+
NarP	hyaABCDEF[hyaA, hyaB, hyaC, hyaD, hyaE, hyaF]				+
NarP	norVW[norV, norW]				+
NarP	ydhYVWXUT[ydhT, ydhU, ydhV, ydhW, ydhX, ydhY]				+
NemR	nemRA-gloA[gloA, nemA, nemR]						+
NhaR	nhaAR[nhaA, nhaR]		+
NhaR	osmC[osmC]		+
NhaR	pgaABCD[pgaA, pgaB, pgaC, pgaD]		+
NikR	nikABCDER[nikA, nikB, nikC, nikD, nikE, nikR]						+
NorR	norR[norR]						+
NorR	norVW[norV, norW]			+
NrdR	nrdAB-yfaE[nrdA, nrdB, yfaE]				+
NrdR	nrdDG[nrdD, nrdG]				+
NrdR	nrdHIEF[nrdE, nrdF, nrdH, nrdI]				+
NsrR	bamE[bamE]				+
NsrR	bdcA[bdcA]				+
NsrR	cdd[cdd]				+
NsrR	dkgB[dkgB]				+
NsrR	dsdC[dsdC]				+
NsrR	feaB[feaB]				+
NsrR	feaR[feaR]				+
NsrR	fliAZY[fliA, fliY, fliZ]				+
NsrR	grxD[grxD]				+
NsrR	hcp-hcr[hcp, hcr]				+
NsrR	hmp[hmp]				+
NsrR	hycABCDEFGHI[hycA, hycB, hycC, hycD, hycE, hycF, hycG, hycH, hycI]				+
NsrR	hypABCDE-fhlA[fhlA, hypA, hypB, hypC, hypD, hypE]				+
NsrR	lrp[lrp]				+
NsrR	mepH[mepH]				+
NsrR	mhpT[mhpT]				+
NsrR	ndh[ndh]				+
NsrR	norR[norR]				+
NsrR	nrfABCDEFG[nrfA, nrfB, nrfC, nrfD, nrfE, nrfF, nrfG]				+
NsrR	pdhR-aceEF-lpd[aceE, aceF]				+
NsrR	pgpC-tadA[pgpC, tadA]				+
NsrR	rfe-wzzE-rffEDGHCA-wzxE-rffT-wzyE-rffM[rfe, rffA, rffC, rffD, rffE, rffG, rffH, rffM, rffT, wzxE, wzyE, wzzE]				+
NsrR	rybB[rybB]				+
NsrR	sodB[sodB]				+
NsrR	sufABCDSE[sufA, sufB, sufC, sufD, sufE, sufS]				+
NsrR	tehAB[tehA, tehB]				+
NsrR	thrS-infC-rpmI-rplT-pheMST-ihfA[ihfA, infC, pheM, pheS, pheT, rplT, rpmI, thrS]				+
NsrR	tsgA[tsgA]				+
NsrR	waaH[waaH]				+
NsrR	ydbD[ydbD]				+
NsrR	yeaE[yeaE]				+
NsrR	yeaR-yoaG[yeaR, yoaG]				+
NsrR	ygbA[ygbA]				+
NsrR	ytfE[ytfE]				+
NtrC	argT-hisJQMP[argT, hisJ, hisM, hisP, hisQ]		+	+
NtrC	astCADBE[astA, astB, astC, astD, astE]		+	+
NtrC	cbl[cbl]		+	+
NtrC	ddpXABCDF[ddpA, ddpB, ddpC, ddpD, ddpF, ddpX]		+	+
NtrC	glnALG[glnA, glnG, glnL]		+	+		+	+
NtrC	glnHPQ[glnH, glnP, glnQ]		+	+		+	+
NtrC	glnK-amtB[amtB, glnK]		+	+
NtrC	nac[nac]		+	+
NtrC	patA[patA]		+	+
NtrC	potFGHI[potF, potG, potH, potI]		+	+
NtrC	rutABCDEFG[rutA, rutB, rutC, rutD, rutE, rutF, rutG]		+	+
NtrC	yeaGH[yeaG, yeaH]		+	+
NtrC	yhdWXYZ[yhdW, yhdX, yhdY, yhdZ]		+	+
OmpR	csgDEFG[csgD, csgE, csgF, csgG]	+
OmpR	micF[micF]	+
OmpR	ompC[ompC]	+
OmpR	ompF[ompF]	+			+
OmpR	omrA[omrA]	+
OmpR	omrB[omrB]	+
OmpR	tppB[tppB]	+
OmpR	bdm-sra[sra]				+
OmpR	bolA[bolA]				+
OmpR	ecnAB[ecnB]				+
OmpR	fadL[fadL]				+
OmpR	flhDC[flhC, flhD]				+
OmpR	nmpC[nmpC]				+
OxyR	ahpCF[ahpC, ahpF]			+
OxyR	dps[dps]			+
OxyR	dsbG[dsbG]			+
OxyR	fldA-uof-fur[fur, uof]			+
OxyR	gor[gor]			+
OxyR	grxA[grxA]			+
OxyR	hcp-hcr[hcp, hcr]			+
OxyR	hemH[hemH]			+
OxyR	katG[katG]			+
OxyR	mntH[mntH]			+
OxyR	oxyS[oxyS]			+
OxyR	sufABCDSE[sufA, sufB, sufC, sufD, sufE, sufS]			+
OxyR	trxC[trxC]			+
OxyR	yhjA[yhjA]			+
OxyR	fhuF[fhuF]						+
OxyR	flu[flu]						+
OxyR	gntP[gntP]						+
OxyR	oxyR[oxyR]						+
OxyR	pth-ychF[ychF]						+
OxyR	uxuAB[uxuA, uxuB]						+
OxyR	ybjC-nfsA-rimK-ybjN[nfsA, rimK, ybjC, ybjN]						+
PaaX	paaABCDEFGHIJK[paaA, paaB, paaC, paaD, paaE, paaF, paaG, paaH, paaI, paaJ, paaK]				+
PaaX	paaZ[paaZ]				+
PdhR	cyoABCDE[cyoA, cyoB, cyoC, cyoD, cyoE]						+
PdhR	glcDEFGBA[glcA, glcB, glcD, glcE, glcF, glcG]						+
PdhR	grcA[grcA]						+
PdhR	hemL[hemL]						+
PdhR	lipA[lipA]						+
PdhR	mraZ-rsmH-ftsLI-murEF-mraY-murD-ftsW-murGC-ddlB-ftsQAZ-lpxC[ddlB, ftsA, ftsI, ftsL, ftsQ, ftsW, ftsZ, lpxC, mraY, mraZ, murC, murD, murE, murF, murG, rsmH]						+
PdhR	ndh[ndh]						+
PdhR	pdhR-aceEF-lpd[aceE, aceF, lpd, pdhR]						+
PdhR	tomB-hha[hha, tomB]						+
PdhR	fecABCDE[fecA, fecB, fecC, fecD, fecE]			+
PepA	carAB[carA, carB]						+
PepA	pepA[pepA]						+
PgrR	ycjY-ymjDC-mpaA[mpaA, ycjY, ymjC, ymjD]				+
PhoB	adiC[adiC]		+
PhoB	amn[amn]		+
PhoB	argP[argP]		+
PhoB	asr[asr]		+
PhoB	cusCFBA[cusA, cusB, cusC, cusF]		+
PhoB	cusRS[cusR, cusS]		+
PhoB	gadAXW[gadW, gadX]		+
PhoB	mipA[mipA]		+
PhoB	ompF[ompF]		+
PhoB	phnCDE_1E_2FGHIJKLMNOP[phnC, phnD, phnE_1, phnE_2, phnF, phnG, phnH, phnI, phnJ, phnK, phnL, phnM, phnN, phnO, phnP]		+
PhoB	phoA-psiF[phoA, psiF]		+
PhoB	phoBR[phoB, phoR]		+
PhoB	phoE[phoE]		+
PhoB	phoH[phoH]		+
PhoB	phoPQ[phoQ]		+
PhoB	psiE[psiE]		+
PhoB	pstSCAB-phoU[phoU, pstA, pstB, pstC, pstS]		+
PhoB	talA-tktB[tktB]		+
PhoB	ugpBAECQ[ugpA, ugpB, ugpC, ugpE, ugpQ]		+			+
PhoB	waaH[waaH]		+
PhoB	ydfH[ydfH]		+
PhoB	yedX[yedX]		+
PhoB	yegH[yegH]		+
PhoB	yhjC[yhjC]		+
PhoB	cra[cra]					+
PhoB	edd-eda[eda]					+
PhoB	feaR[feaR]					+
PhoB	pitB[pitB]					+
PhoB	prpR[prpR]					+
PhoB	sbcDC[sbcC, sbcD]					+
PhoP	borD[borD]		+	+
PhoP	cysB[cysB]		+	+
PhoP	envY-ompT[ompT]		+	+
PhoP	fadL[fadL]		+	+
PhoP	gadAXW[gadW]		+	+
PhoP	gadE-mdtEF[gadE]		+	+
PhoP	glgBXCAP[glgA, glgB, glgC, glgP, glgX]		+	+
PhoP	hdeAB-yhiD[hdeA, hdeB, yhiD]		+	+
PhoP	hdeD[hdeD]		+	+
PhoP	hemL[hemL]		+	+
PhoP	iraM[iraM]		+	+
PhoP	malS[malS]		+	+
PhoP	metBL[metB, metL]		+	+
PhoP	mgrB[mgrB]		+	+
PhoP	mgrR[mgrR]		+	+
PhoP	mgtLA[mgtA, mgtL]		+	+
PhoP	nagBAC-umpH[nagA]		+	+
PhoP	pagP[pagP]		+	+
PhoP	phoPQ[phoP, phoQ]		+	+		+	+
PhoP	purHD[purD, purH]		+	+
PhoP	rstAB[rstA, rstB]		+	+
PhoP	rutABCDEFG[rutA, rutB, rutC, rutD, rutE, rutF, rutG]		+	+
PhoP	slyB[slyB]		+	+		+	+
PhoP	tolC-ygiABC[tolC, ygiA, ygiB, ygiC]		+	+
PhoP	ybjG[ybjG]		+	+
PhoP	yneM[yneM]		+	+
PhoP	yrbL[yrbL]		+	+
PhoP	acrAB[acrA, acrB]					+	+
PhoP	argD[argD]					+	+
PhoP	dcuD[dcuD]					+	+
PhoP	safA-ydeO[safA, ydeO]					+	+
PhoP	treR[treR]					+	+
PhoP	ydeP[ydeP]					+	+
PrpR	prpBCDE[prpB, prpC, prpD, prpE]			+
PrpR	prpR[prpR]						+
PspF	pspABCDE[pspA, pspB, pspC, pspD, pspE]			+
PspF	pspF[pspF]						+
PspF	pspG[pspG]			+
PurR	carAB[carA, carB]						+
PurR	codBA[codA, codB]						+
PurR	cvpA-purF-ubiX[cvpA, purF, ubiX]						+
PurR	gcvTHP[gcvH, gcvP, gcvT]						+
PurR	glrR-glnB[glnB]						+
PurR	glyA[glyA]						+
PurR	guaBA[guaA, guaB]						+
PurR	hflD-purB[hflD, purB]						+
PurR	lolB-ispE-prs[prs]						+
PurR	purA[purA]						+
PurR	purC[purC]						+
PurR	purEK[purE, purK]						+
PurR	purHD[purD, purH]						+
PurR	purL[purL]						+
PurR	purMN[purM, purN]						+
PurR	purR[purR]						+
PurR	pyrC[pyrC]						+
PurR	pyrD[pyrD]						+
PurR	speAB[speA, speB]						+
PutA	putA[putA]						+
PutA	putP[putP]						+
PuuR	puuAP[puuA, puuP]						+
PuuR	puuDRCBE[puuB, puuC, puuD, puuE, puuR]						+
QseB	flhDC[flhC, flhD]		+
QseB	qseBC[qseB, qseC]		+
RbsR	add[add]			+
RbsR	purHD[purD, purH]						+
RbsR	rbsDACBKR[rbsA, rbsB, rbsC, rbsD, rbsK, rbsR]						+
RcdA	asr[asr]	+
RcdA	bluF[bluF]	+
RcdA	csgDEFG[csgD, csgE, csgF, csgG]	+
RcdA	ydeI[ydeI]	+
RcdA	sulA[sulA]				+
RcdA	yagK[yagK]				+
RclR	rclABC[rclA, rclB, rclC]	+
RcnR	rcnAB[rcnA, rcnB]						+
RcnR	rcnR[rcnR]						+
RcsB	rcsA[rcsA]	+
RcsB	wza-wzb-wzc-wcaAB[wcaA, wcaB, wza, wzb, wzc]	+
RcsB	yjbEFGH[yjbE, yjbF, yjbG, yjbH]	+
RcsB	bdm-sra[bdm, sra]	+
RcsB	gadBC[gadB, gadC]	+
RcsB	gadY[gadY]	+
RcsB	hdeAB-yhiD[hdeA, hdeB, yhiD]	+
RcsB	hdeD[hdeD]	+
RcsB	lolA-rarA[lolA, rarA]	+
RcsB	mraZ-rsmH-ftsLI-murEF-mraY-murD-ftsW-murGC-ddlB-ftsQAZ-lpxC[ftsA, ftsZ]	+
RcsB	osmB[osmB]	+
RcsB	osmC[osmC]	+
RcsB	rprA[rprA]	+
RcsB	safA-ydeO[safA, ydeO]	+
RcsB	ydeP[ydeP]	+
RcsB	csgDEFG[csgD, csgE, csgF, csgG]				+
RcsB	flhDC[flhC, flhD]				+
RcsB	gadAXW[gadA, gadX]				+
RelB	relBE-hokD[hokD, relB, relE]						+
RhaR	rhaSR[rhaR, rhaS]		+
RhaS	rhaBAD[rhaA, rhaB, rhaD]		+
RhaS	rhaSR[rhaR, rhaS]		+
RhaS	rhaT[rhaT]		+
Rob	acnA[acnA]			+
Rob	acrAB[acrA, acrB]			+
Rob	acrZ[acrZ]			+
Rob	aslB[aslB]			+
Rob	fumAC[fumC]			+
Rob	inaA[inaA]			+
Rob	marRAB[marA, marB, marR]			+
Rob	micF[micF]			+
Rob	mltF[mltF]			+
Rob	nfo[nfo]			+
Rob	nfsB[nfsB]			+
Rob	rob[rob]						+
Rob	sodA[sodA]			+
Rob	tolC-ygiABC[tolC, ygiA, ygiB, ygiC]			+
Rob	ybiS[ybiS]			+
Rob	ybjC-nfsA-rimK-ybjN[nfsA, rimK, ybjC, ybjN]			+
Rob	zwf[zwf]			+
RstA	asr[asr]	+
RstA	narGHJI[narG, narH, narI, narJ]	+
RstA	csgDEFG[csgD, csgE, csgF, csgG]				+
RstA	ompF[ompF]				+
RtcR	rtcBA[rtcA, rtcB]	+
RutR	carAB[carA, carB]			+
RutR	fepB[fepB]						+
RutR	gadAXW[gadW, gadX]						+
RutR	gmr[gmr]						+
RutR	nemRA-gloA[gloA, nemA, nemR]						+
RutR	rutABCDEFG[rutA, rutB, rutC, rutD, rutE, rutF, rutG]						+
RutR	rutR[rutR]						+
SdiA	gadAXW[gadW]	+
SdiA	mraZ-rsmH-ftsLI-murEF-mraY-murD-ftsW-murGC-ddlB-ftsQAZ-lpxC[ftsQ: ftsA, ftsQ, ftsZ]	+			+
SdiA	ydiV[ydiV]	+
SgrR	alaC[alaC]			+
SgrR	sgrR-sroA-tbpA-thiPQ[sgrR, sroA, tbpA, thiP, thiQ]						+
SgrR	sgrST-setA[setA, sgrS, sgrT]			+
SlyA	hlyE[hlyE]	+
SoxR	fumAC[fumC]			+
SoxR	soxR[soxR]						+
SoxR	soxS[soxS]			+
SoxS	acnA[acnA]			+
SoxS	acrAB[acrA, acrB]			+
SoxS	acrZ[acrZ]			+
SoxS	fldA-uof-fur[fldA, fur, uof]			+
SoxS	fldB[fldB]			+
SoxS	fpr[fpr]			+
SoxS	fumAC[fumC]			+
SoxS	inaA[inaA]			+
SoxS	marRAB[marA, marB, marR]			+
SoxS	micF[micF]			+
SoxS	nfo[nfo]			+
SoxS	nfsB[nfsB]			+
SoxS	pgi[pgi]			+
SoxS	poxB-ltaE-ybjT[poxB]			+
SoxS	pqiAB[pqiA, pqiB]			+
SoxS	ptsG[ptsG]			+
SoxS	ribA[ribA]			+
SoxS	rob[rob]						+
SoxS	sodA[sodA]			+
SoxS	soxS[soxS]						+
SoxS	tolC-ygiABC[tolC, ygiA, ygiB, ygiC]			+
SoxS	waaQGPSBIJYZU[waaY, waaZ]			+
SoxS	ybjC-nfsA-rimK-ybjN[nfsA, rimK, ybjC, ybjN]			+
SoxS	ydbK-ompN[ompN, ydbK]			+
SoxS	zinT[zinT]			+
SoxS	zwf[zwf]			+
StpA	bglGFB[bglB, bglF, bglG]						+
StpA	leuO[leuO]						+
StpA	ssrS-fau[fau, ssrS]						+
StpA	stpA[stpA]						+
TdcA	tdcABCDEFG[tdcA, tdcB, tdcC, tdcD, tdcE, tdcF, tdcG]		+
TdcR	tdcABCDEFG[tdcA, tdcB, tdcC, tdcD, tdcE, tdcF, tdcG]	+
TorR	gadAXW[gadA, gadX]						+
TorR	hdeAB-yhiD[hdeA, hdeB, yhiD]			+
TorR	tnaCAB[tnaA, tnaB, tnaC]			+
TorR	torCAD[torA, torC, torD]			+
TorR	torR[torR]						+
TreR	treBC[treB, treC]				+
TrpR	aroH[aroH]						+
TrpR	aroL-yaiA-aroM[aroL, aroM, yaiA]						+
TrpR	mtr[mtr]						+
TrpR	trpLEDCBA[trpA, trpB, trpC, trpD, trpE, trpL]						+
TrpR	trpR[trpR]						+
TyrR	aroF-tyrA[aroF, tyrA]						+
TyrR	aroG[aroG]						+
TyrR	aroL-yaiA-aroM[aroL, aroM, yaiA]						+
TyrR	aroP[aroP]						+
TyrR	folA[folA]			+
TyrR	mtr[mtr]			+
TyrR	tyrB[tyrB]						+
TyrR	tyrP[tyrP]			+			+
TyrR	ycjXF-tyrR[tyrR]						+
UhpA	uhpT[uhpT]	+
UidR	uidABC[uidA, uidB, uidC]						+
UidR	uidR[uidR]						+
UlaR	ulaABCDEF[ulaA, ulaB, ulaC, ulaD, ulaE, ulaF]				+
UlaR	ulaG[ulaG]				+
UxuR	gntP[gntP]						+
UxuR	uidABC[uidA, uidB, uidC]						+
UxuR	uxuAB[uxuA, uxuB]						+
UxuR	uxuR[uxuR]						+
UxuR	yjjM[yjjM]						+
XapR	xapAB[xapA, xapB]	+
XylR	xylAB[xylA, xylB]		+
XylR	xylFGHR[xylF, xylG, xylH, xylR]		+
YdeO	gadE-mdtEF[gadE, mdtE, mdtF]			+
YdeO	safA-ydeO[safA, ydeO]						+
YefM	yefM-yoeB[yefM, yoeB]						+
YehT	yjiY[yjiY]	+
YeiL	yeiL[yeiL]		+
YiaJ	yiaJ[yiaJ]						+
YiaJ	yiaKLMNO-lyxK-sgbHUE[lyxK, sgbE, sgbH, sgbU, yiaK, yiaL, yiaM, yiaN, yiaO]						+
YpdB	yhjX[yhjX]	+
YqhC	yqhD-dkgA[dkgA, yqhD]	+
YqjI	yqjH[yqjH]						+
YqjI	yqjI[yqjI]						+
ZntR	zntA[zntA]	+
ZraR	zraP[zraP]		+
ZraR	zraSR[zraR, zraS]		+
Zur	ykgMO[ykgM, ykgO]				+
Zur	zinT[zinT]				+
Zur	znuA[znuA]				+
Zur	znuCB[znuB, znuC]				+
		172	414	581	243	127	602	2139

## Sheet: Sheet S3
This sheet contains R-T interactions involved in biosynthesis of all amino acids in E. coli and their distribution across topologies A,B,C,D,E, and F.										Interactions without global regulators correspond to avoidence of interactions coming from global regulators (IHF, H-NS, Fis, Lrp, CRP, ArcA, and FNR).
Amino Acid	Genes Involved in Synthesis	Regulators			Frequency	Total Frequency With GR									Total Frequency		Normalized Frequency
		Repressors	Activators						A	B	C	D	E	F	A-C	D-F	A-C	D-F
Arginine	argA	ArgR			F	18F 7C 1B 1E	One pathway	Arginie		1	7		1	18	8	19	0.296296	0.703704
	argB	ArgR			F			Asparagine		1	1				2	0	1	0
	argE	ArgR			F			Alanine		1	2		1	5	3	6	0.333333	0.666667
	argD	ArgR phoP			2F E			Aspartate			1			2	1	2	0.333333	0.666667
	argF	ArgR			F			Glutamate	2	1	5		2	8	8	10	0.444444	0.555556
	argI	ArgR			F			Glutamine		2	3		2	2	5	4	0.555556	0.444444
	argG	ArgR	CRP		F C B			Cysteine			2			1	2	1	0.666667	0.333333
	carAB	ArgR purR pepA	RutR Fis IHF		2(4F and 3C)			Glycine			1			2	1	2	0.333333	0.666667
	argC	ArgR			F			Isoleucine		2	10			14	12	14	0.461538	0.538462
	argH	ArgR			F			Leucine		4	5			3	9	3	0.75	0.25
Asparagine	asnA		AsnC		C	1B 1C	Two pathways, in one only asnB is involved and in one both are involved. Both are single step pathways	Lysine			6		1	2	6	3	0.666667	0.333333
	asnB		GadX		B			Valine		2	9			12	11	12	0.478261	0.521739
								Methionine	1	2	4	4		2	7	6	0.538462	0.461538
								Phenylalanine			2			6	2	6	0.25	0.75
Alanine P 1						5F 2C 1B 1E	Three pathways	Serine		1	3		1	3	4	4	0.5	0.5
	AvtA	Lrp			F			Threonine	2	2	4		0	2	8	2	0.8	0.2
	DadX (alr also code for the same enzyme but not regulated)	CRP Lrp	CRP		B C E 2F			Tryptophan						5	0	5	0	1
								Tyrosine			1			4	1	4	0.2	0.8
Alanine P 2	alaA	Lrp			F
	alaC		SrgR		C
Alanine P 3	iscS	IscR			F
Aspartate	aspC	FNR Fur	FNR		C 2F	1C 2F	One pathway
Glutamine	glnA	NtrC CRP	NtrC CRP		2(B C E F) and C	2B 3C 2E 2F	One pathway
			Fis
Glutamate 1	gltBD	ArgR CRP FNR Nac Fur	AdiYGadE HdfR IHF Lrp		5F E		Two pathways
					2A B 2C
						2A B 5C 2E 8F
Glumatae 2	gdhA	Fur CRP Nac	ArgP FNR Fur
					3C
					3F E
							One pathway two steps only second step is genetically regulated
Cysteine	cysK both codes for same enzyme		CysB		C	2C 1F
	cysM	HNS	CysB		C F
	cysE (regulated by small RNA)
Glycine	glyA	MetR PurR	MetR		C 2F	1C 2F	One pathway one step
Histidine	hisA						One pathway 10 steps 9 enzymes coded by 8 genes and is regulated by end product as well as dksA (RNA pol binding protein)
	hisB
	hisC
	hisD
	hisF
	hisG
	hisH
	hisI
Isoleucine	ilvA	Lrp IHF	IHF		2F C	10C 2B 14F	One pathway five steps
	ilvBN		CRP		2B 2C
	ilvIH same enzyme as BN	Lrp HNS	Lrp		4F 2C
	ilvGM (codes for same enzyme as ilvBN ilvIH)	Lrp IHF	IHF		4F 2C
	ilvC		IlvY		C
	ilvD	Lrp IHF	IHF		2F C
	ilvE	Lrp IHF	IHF		2F C
							One pathway and five steps
Leucine	leuA		LeuO		B C	3F 5C 4B
	leuCD		LeuO		2B 2C
	leuB		LeuO		B C
	tyrB	TyrR			F
	ilvE	Lrp IHF	IHF		2F C
							9 steps
Lysine	lysC		ArgP		C	6C 2F 1E
	asd		ArgP		C
	dapA
	dapB		ArgP		C
	dapD		ArgP		C
	argD	ArgR PhoP			E 2F
	dapE
	dapF
	lysA		ArgP LysR		2C
Valine	ilvBN		CRP		2B 2C	12F 9C 2B
	ilvIH same enzyme as BN	Lrp HNS	Lrp		4F 2C
	ilvGM (codes for same enzyme as ilvBN ilvIH)	Lrp IHF	IHF		4F 2C
	ilvC		IlvY		C
	ilvD	Lrp IHF	IHF		2F C
	ilvE	Lrp IHF	IHF		2F C
Methionine	metA	MetJ			D	A 2B 4C 4D 2F
	metB	MetJ	PhoP YjiE		A D B C
	malY	MalI	CRP		F B C
	metC	MetJ			D
	metE	MetJ	MetR		D C
	metH	Fur	MetR		F C
							Three steps
Phenylalanine	tyrA pheA	TyrR			F	6F 2C	2c 6F
	pheA
	ilvE aspC tyrB	IHF lrp FNR fur Tyr	IHF FNR		5F
					2C
Proline	proB	Inhibied by end product					Two steps but not TFS involved
	proA
	proC
Serine	serA	Lrp Nac	Lrp CRP		2F B 2C	3F 1B 3C 1E	Three steps
	serC	CRP	Lrp		C E F		3C 1B 1E 3F
	serB
Threonine						4C 2B 2D 2A	Six steps
	lysC metL thrA	MetJ	ArgP PhoP yjiE		A D C B C		2F 5C 2B 2D 2A
	asd		ArgP		C
	metL thrA	MetJ	PhoP yjiE		A D B C
	thrB
	thrC
Tryptophan	trpA (all are under same transcription unit)	TrpR	F		5F	5F	Six steps
	trpB	TrpR	F
	trpC	TrpR	F
	trpD	TrpR	F
	trpE	TrpR	F
Tyrosine	pheA
	tyrA	TYrR			F	4F 1C
	aspC tyrB	FNR Fur Tyr	FNR		3F
					C

## Sheet: Sheet S4
This sheet contains R-T interactions involved in transport of each amino acid in E. coli and their distribution across topologies A,B,C,D,E, and F.										Interactions without global regulators correspond to avoidence of interactions coming from global regulators (IHF, H-NS, Fis, Lrp, CRP, ArcA, and FNR).
Amino Acid	Genes Involved in transport	Regulators		Frequency	Total Frequency With GR								Total Frequency		Normalized Frequency
		Repressors	Activators				A	B	C	D	E	F	A-C	D-F	A-C	D-F
Alanine	cycA (not regulated)					Ala							0	0	0	0
	Symporter					Arg	0	4	7	0	0	3	11	3	0.785714	0.214286
						Asp	4	0	0	0	0	0	4	0	1	0
						Cys							0	0		0
Arginine	hisM	ArgR	HNS	1F 1B 2C	4B 7C 3F	Glu	6	2	0	1	1	3	8	5	0.615385	0.384615
			NtrC			Gly	0	0	0	0	0	3	0	3	0	0
						His	0	4	8	0	0	4	12	4	0.75	0.25
	hisQ	ArgR	HNS	1F 1B 2C		Isoleu	0	0	0	0	0	5	0	5	0	0
			NtrC			Leu	0	0	0	0	0	6	0	6	0	0
						Lys	0	4	9	0	0	3	13	3	0.8125	0.1875
	hisP	ArgR	HNS	1F 1B 2C		Met	3	0	0	3	0	0	3	3	0.5	0.5
			NtrC			Phe	1	0	0	0	0	1	1	1	0.5	0.5
						Pro	0	0	0	0	0	3	0	3	0	0
	argT		NtrC	1B 1C		Ser							0	0	0	0
						Thr	1	2	3	0	0	0	6	0	1	0
						Tyr	1	0	1	1	0	3	2	4	0.333333	0.666667
Aspartate	glTI		FlhDC	A	4A	Val	0	0	0	0	0	5	0	5	0	0
	gltJ		FlhDC	A
	gltK		FlhDC	A
	gltL		FlhDC	A
Glutamate	glTI		FlhDC	A	6A 2B 1D 1E 3F
	gltJ		FlhDC	A
	gltK		FlhDC	A
	gltL		FlhDC	A
	2nd transporter
	gadC	GadW	AdiY	1D 1E 3F
		CRP	GadE	2A 2B			Arg	0.785714
		Fis	GadX				Asp	1
		FliZ	RcsB				Glu	0.785714
							His	0.75			Met	0.66667
							Lys	0.8			Thr	1
Glycine	proV	HNS		1F	3F		Met	0.666667			Asp	1
							Phe	0.666667			Phe	0.66667
	proW	HNS		1F			Thr	1			Arg	0.785714
							Tyr	0.625			His	0.75
	proX	HNS		1F							Tyr	0.625
											Glu	0.785714
	cycA (not regulated)										Lys	0.8
Histidine	hisM	ArgR	HNS	1F 1B 2C	4B 8C 4F
			NtrC
	hisQ	ArgR	HNS	1F 1B 2C
			NtrC
	hisP	ArgR	HNS	1F 1B 2C
			NtrC
	hisJ	ArgR	HNS	1F 1B 2C
			NtrC
Isoleucine	livF	Lrp		1F	5F
	livG	Lrp		1F
	livH	Lrp		1F
	livM	Lrp		1F
	livJ	Lrp	DksA	1F
Leucine	livF	Lrp		1F	6F
	livG	Lrp		1F
	livH	Lrp		1F
	livM	Lrp		1F
	livK	Lrp		1F
	livJ	Lrp	DksA	1F
Lysine	lysP		Lrp	2C	4B 9C 3F
			ArgP
	hisM	ArgR	HNS	1F 1B 2C
			NtrC
	hisQ	ArgR	HNS	1F 1B 2C
			NtrC
	hisP	ArgR	HNS	1F 1B 2C
			NtrC
	argT		NtrC	1B 1C
Methionine	metN	MetJ	HypT	1D 1A	3A 3D
	metI	MetJ	HypT	1A 1D
	metQ	MetJ	HypT	1A 1D
Phenylalanine	aroP	TyrR	Cra	1F 1A	1A 1F
	pheP (not regulated)
Proline	proV	HNS		1F	3F
	proW	HNS		1F
	proX	HNS		1F
Serine	cycA (not regulated)
Threonine	tdcC		TdcR	1A 2B 3C	1A 2B 3C
			TdcA
			IHF
			Fnr
			CRP
Tyrosine	aroP	TyrR	Cra	1F 1A	1A 1C 1D 3F
	2nd pathway
	tyrP	Hu	TyrR	1D 1C 2F
		TyrR
		IHF
Tryptophan	aroP	TyrR	Cra	1F 1A	1A 1F
Valine	livF	Lrp		1F	5F
	livG	Lrp		1F
	livH	Lrp		1F
	livM	Lrp		1F
	livJ	Lrp	DksA	1F
Glutamine	glnH	NtrC	NtrC	1E 1F 1B 2C	3B 6C 3E 4F
			IHF
	glnP	NtrC	NtrC	1E 1F 1B 2C
			IHF
	glnQ	NtrC	NtrC	1E 2F 1B 2C
		Fis	IHF

## Sheet: Sheet S5
This sheet contains relative availability for all amino acids to E. coli in intestine as reported by Nixon and Mawer, 1970; and also availability when normalized with genomic frequency.
Amino acids	Availability
Isoleu	87
Ala	163
Leu	190
Val	154
Met	62
Thr	133
Gly	200
Ser	167
Asp	150
Pro	136
Phe	183
Arg	340
His	181
Tyr	233
Cys	120
Glu	580
Lys	730

## Sheet: Sheet S6
This sheet contains R-T interactions involved in each sugar metabolism in E. coli and their distribution across topologies A,B,C,D,E, and F.							Interactions without global regulators correspond to avoidence of interactions coming from global regulators (IHF, H-NS, Fis, Lrp, CRP, ArcA, and FNR).
Sugar	Genes Involved	Regulator		Frequency	Frequency with GR		With Global Regulator							Total Frequency		Normalized Frequency
		Repressor	Activator					A	B	C	D	E	F	A-C	D-F	A-C	D-F
RIbose	rbsD	RbsR	CRP	B C F	2B 2C 2F		Ribose		2	2			2	4	2	0.666667	0.333333
	rbsK	RbsR	CRP	B C F			NANA		3	3	3		3	6	6	0.5	0.5
							Nag		3	3		2	4	6	6	0.5	0.5
							Gluconate		3	2	2	1		5	3	0.625	0.375
NANA	nanA	Fis NanR	CRP	D F B C	3B 3C 3D 3F		Glucuronate		4	5	3	1	9	9	13	0.409091	0.590909
	nanK	Fis NanR	CRP	D F B C			Fucose		6	3				9	0	1	0
	nanE	Fis NanR	CRP	D F B C			Mannose		1	1		1	1	2	2	0.5	0.5
							L-Arabinose		6	6		3	3	12	6	0.666667	0.333333
							Lactose		1	1	1	1	2	2	4	0.333333	0.666667
							Maltose	3	2					5	0	1	0
Nag	nagA	CRP NagC	CRP PhoP	E 2F 2B 2C	3B 3C 2E 4F
	nagB	CRP NagC	CRP	E 2F B C
Gluconate	gntK	GntR IdnR	CRP	D E B C	3B 2C 2D 1E
	idnK	GntR	IdnR CRP	D 2B C
Glucuronate	uidA	UidR UxuR	CRP	2F B C	4B 5C 3D 1E 9F
	uxaC	ExuR	CRP FNR	F B 2C
	uxuB	OxyR UxuR ExuR	CRP	3F B C
	uxuA	OxyR UxuR ExuR	CRP	3F B C
	kdgK	-
	eda	PhoB GntR Cra KdgR		E 3D
Fucose	fucI		CRP	B C	6B 3C
			FucR	B
	fucK		CRP	B C
			FucR	B
	fucA		CRP	B C
			FucR	B
Mannose	manA	CRP	CRP	BCEF	1B 1C 1E 1F
L -Arabinose	araA	AraC	CRP AraC	2B 2C E F	6B 6C 3E 3F
	araB	AraC	CRP AraC	2B 2C E F
	araD	AraC	CRP AraC	2B 2C E F
Maltose	malP		MalT FNR	A C	3A 2C
	malQ		MalT FNR	A C
	malZ		MalT	A
Lactose	lacZ	LacI HNS CRP	CRP	D B C E 2F	D B C E 2F

## Sheet: Sheet S7
This sheet contains R-T interactions of all sugar transport genes in E. coli and their distribution across topologies A,B,C,D,E, and F.						Interactions without global regulators correspond to avoidence of interactions coming from global regulators (IHF, H-NS, Fis, Lrp, CRP, ArcA, and FNR).
Sugar	Genes Involved in Transport	Regulator		Frequency	Total Frequency with Global R	W/GR							Total Frequency		Normalized Frequency
		Repressor	Activator				A	B	C	D	E	F	A-C	D-F	A-C	D-F
Gluconate	gntT	GntR	CRP	D B C	5B 4C 3D 1E 2F	Gluconate	0	5	4	3	1	2	9	6	0.6	0.4
						Ribose	0	3	3	0	0	3	6	3	0.666667	0.333333
	gntU	GntR		D E		Glucuronate	0	2	1	0	0	1	3	1	0.75	0.25
		IdnR	CRP	B C		Fucose	0	2	1	0	0	0	3	0	1	0
	gntP	OxyR		2F		NANA	0	1	1	0	1	1	2	2	0.5	0.5
		UxuR	CRP	B C		Mannose	0	3	3	3	0	6	6	9	0.4	0.6
	idnT	GntR	IdnR	D 2B C		NAG	0	1	1	0	1	2	2	3	0.4	0.6
			CRP			Lactose	0	1	1	1	1	2	2	4	0.333333	0.666667
						Maltose	4	4	7	3	0	0	15	3	0.833333	0.166667
Ribose	rbsA (ATP binding)	RbsR	CRP	F	3B 3C 3F	Arabinose	0	8	8	0	0	0	16	0	1	0
				B C
	rbsB(substrate binding)	RbsR	CRP	F
				B C
	rbsC (mem)	RbsR	CRP	F
				B C
Glucuronate	exuT	exuR	CRP	F	2B 1C 1F
			DpiA	2B C
Fucose	fucP		CRP	2B 1C	2B 1C
			FucR
NANA	murP	MurR	CRP	1E 1F 1B 1C	1E 1F 1B 1C
Mannose	manX	Cra	CRP	1D	3B 3C 3D 6F
		Mlc		2F
		NagC		1B 1C
	manY	Cra	CRP	1D
		Mlc		2F
		NagC		1B 1C
	manZ	Cra	CRP	1D
		Mlc		2F
		NagC		1B 1C
NAG	nagE	NagC		1B 1C 1E 2F	1B 1C 1E 2F
		CRP	CRP
Lactose	lacY	HNS		1B 1C 1D 1E 2F	1B 1C 1D 1E 2F
		LacI
		CRP	CRP
Maltose	malK		MalT	1A 1B 1C	4A 4B 7C 3D
			CRP
	malE	CreB	MalT	1D 1A 1B 2C
			Fis
			CRP
	malF	CreB	MalT	1D 1A 1B 2C
			Fis
			CRP
	malG	CreB	MalT	1D 1A 1B 2C
			Fis
			CRP
Arabinsoe	araF		AraC	2B 2C	8B 8C
			CRP
	araG		AraC	2B 2C
			CRP
	araH		AraC	2B 2C
			CRP
	araE		AraC	2B 2C
			CRP
